# Supplementary material for: Using a ResearchKit Smartphone App to Collect Rheumatoid Arthritis Symptoms From Real-World Participants: Feasibility Study
Source: PubMed Central journal article supplement (PMC6231853; doi:10.2196/mhealth.9656), 2018-09-13
Supplement: mhealth_v6i9e177_app1.pdf [file mhealth_v6i9e177_app1.pdf]

**POSSIBLE** mobile

06-14-16

**PARADE app - GSK**  
**IRB Submission Deck**

Presentation Created For GlaxoSmithKline  
Created By POSSIBLE Mobile



# CONTENTS

|    |                                   |    |                                  |    |                           |
|----|-----------------------------------|----|----------------------------------|----|---------------------------|
| 3  | Welcome Screens                   | 21 | Learn Screens, 3                 | 38 | HAQ Screens, 7            |
| 4  | Welcome Screens, 2                | 22 | Profile & More Screens           | 39 | Fatigue Scale Screens     |
| 5  | Eligibility Screens               | 23 | Pain Scale Screens               | 40 | Fatigue Scale Screens,2   |
| 6  | Consent Screens                   | 24 | Morning Stiffness Survey Screens | 41 | Fatigue Scale Screens, 3  |
| 7  | Consent Screens, 2                | 25 | Mood Scale Screens               | 42 | Fatigue Scale Screens, 4  |
| 8  | Consent Screens, 3                | 26 | RA Severity Survey Screens       | 43 | Joint Pain Map Screens    |
| 9  | Passcode Screens                  | 27 | Walk Test Screens                | 44 | Wrist Exercise Screens    |
| 10 | Registration Screens              | 28 | Walk Test Screens, 2             | 45 | Wrist Exercise Screens, 2 |
| 11 | Medical History Survey Screens    | 29 | Walk Test Screens, 3             | 46 | Wrist Exercise Screens, 3 |
| 12 | Medical History Survey Screens, 2 | 30 | Health Status Survey Screens     | 47 | Wrist Exercise Screens, 4 |
| 13 | Medical History Survey Screens, 3 | 31 | Health Status Survey Screens, 2  | 48 | End of Study Screens      |
| 14 | Medical History Survey Screens, 4 | 32 | HAQ Screens                      | 49 | End of Study Screens, 2   |
| 15 | Medical History Survey Screens, 5 | 33 | HAQ Screens, 2                   | 50 | End of Study Screens, 3   |
| 16 | Task List & Badges Screens        | 34 | HAQ Screens, 3                   |    |                           |
| 17 | Dashboard Screens                 | 35 | HAQ Screens, 4                   |    |                           |
| 18 | Dashboard Screens, 2              | 36 | HAQ Screens, 5                   |    |                           |
| 19 | Learn Screens                     | 37 | HAQ Screens, 6                   |    |                           |
| 20 | Learn Screens, 2                  |    |                                  |    |                           |

Welcome Screen: First Card

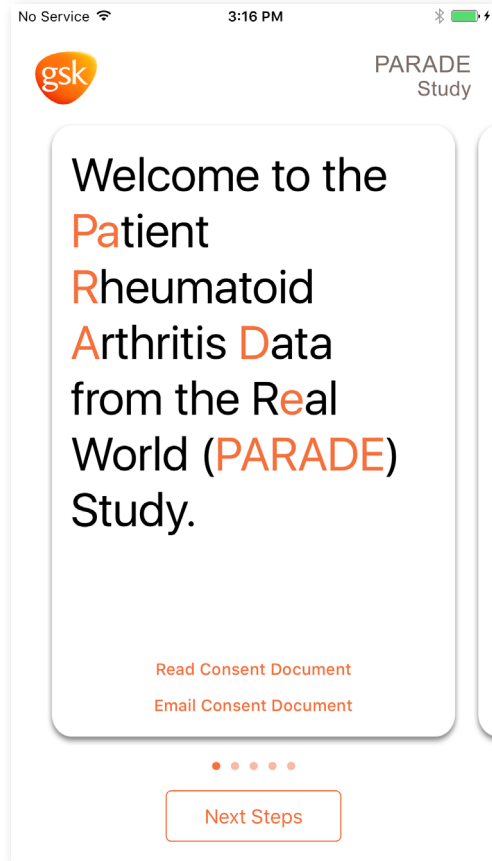

Welcome Screen: Second Card

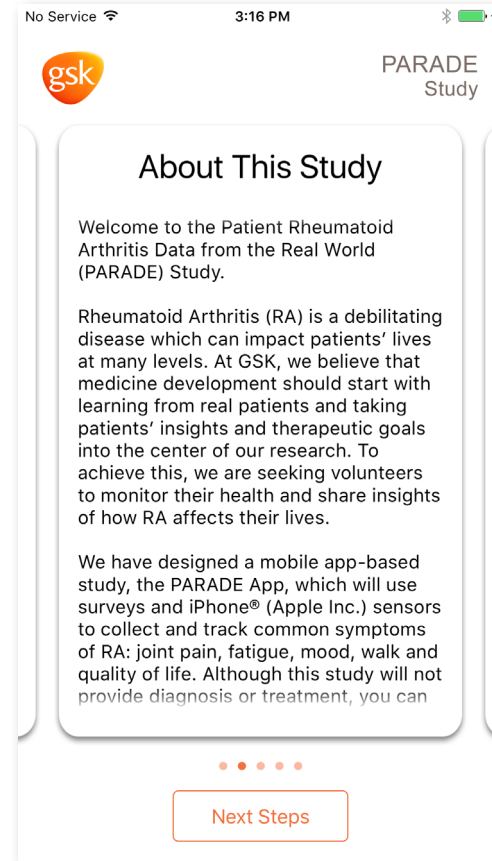

Welcome Screen: Second Card (cont.)

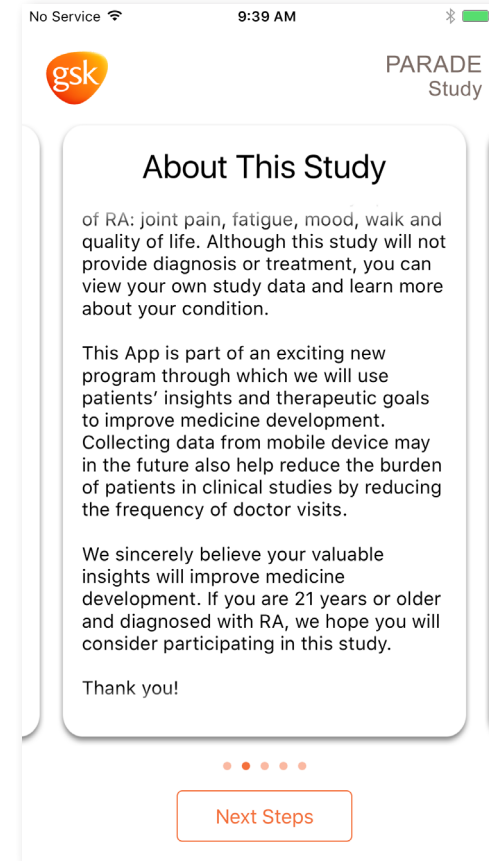

Welcome Screen: Third Card

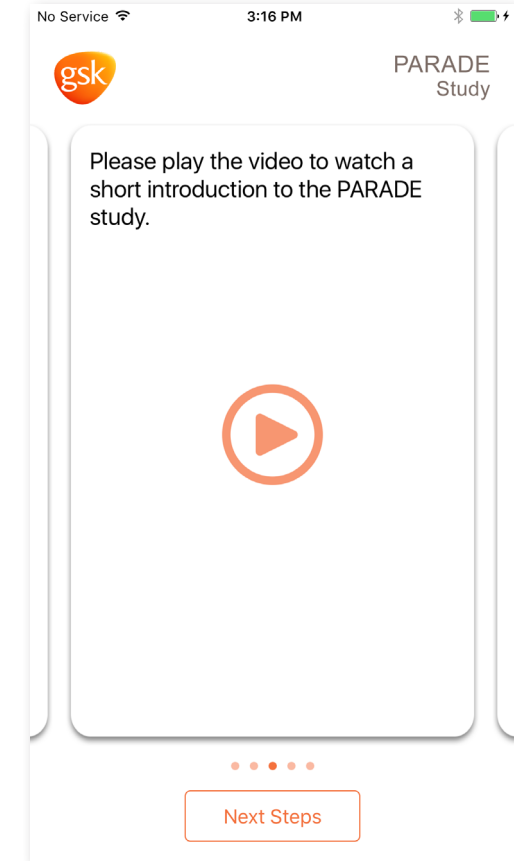

# Welcome Screens, 2

Welcome Screen: Video

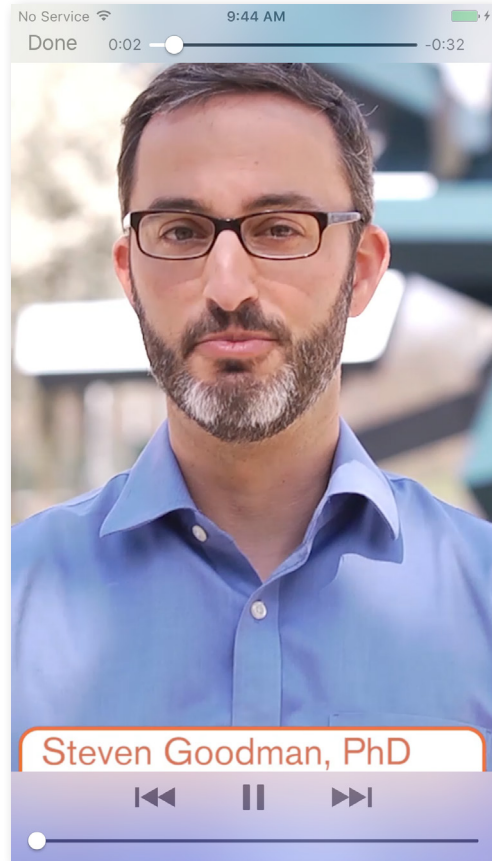

Welcome Screen: Fourth Card

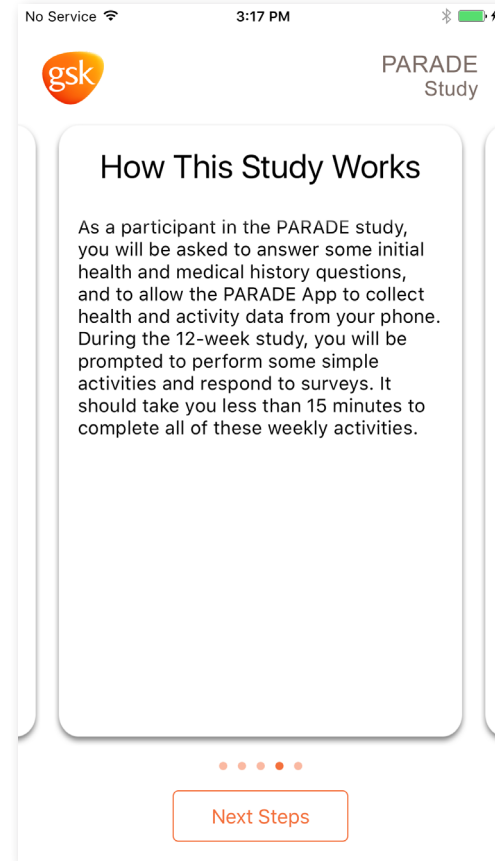

Welcome Screen: Fifth Card

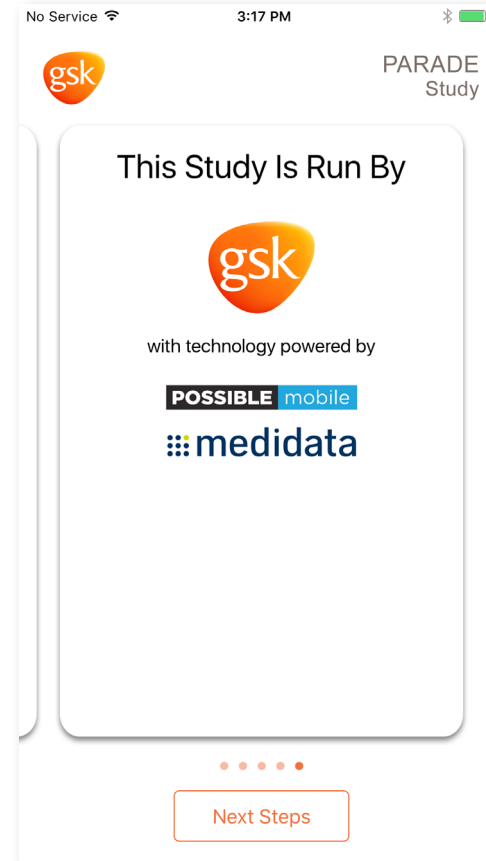



# Eligibility Screens

Eligibility Screen 1



A mobile app screenshot showing three eligibility questions. Each question has 'Yes' and 'No' options. The questions are: 'Are you 21 or older?', 'Do you understand English?', and 'Do you live in the US?'. The screen includes a status bar at the top with 'No Service', '3:18 PM', and battery icons. A 'Cancel' button is in the top right corner.

No Service 3:18 PM Cancel

Step 1 of 1

Are you 21 or older?

Yes No

Do you understand English?

Yes No

Do you live in the US?

Yes No

Eligibility Screen 1 (cont.)



A mobile app screenshot showing two more eligibility questions. Each question has 'Yes' and 'No' options. The questions are: 'Do you live in the US?' and 'Have you been diagnosed with Rheumatoid Arthritis (RA) by a doctor?'. The screen includes a status bar at the top with 'No Service', '9:47 AM', and battery icons. A 'Cancel' button is in the top right corner.

No Service 9:47 AM Cancel

Step 1 of 1

Do you live in the US?

Yes No

Have you been diagnosed with Rheumatoid Arthritis (RA) by a doctor?

Yes No

Eligibility Screen 2

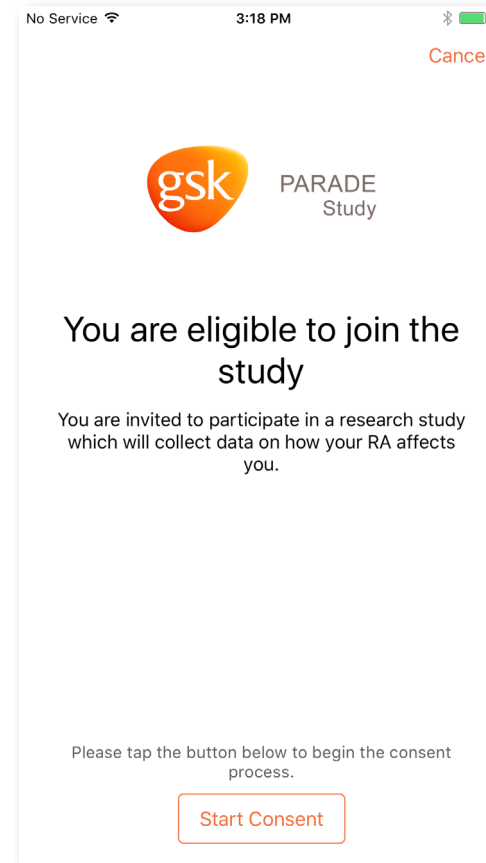

A mobile app screenshot showing a confirmation message. It features the GSK logo and 'PARADE Study' text. The main text says 'You are eligible to join the study' and 'You are invited to participate in a research study which will collect data on how your RA affects you.' At the bottom, there is a 'Start Consent' button. The screen includes a status bar at the top with 'No Service', '3:18 PM', and battery icons. A 'Cancel' button is in the top right corner.

No Service 3:18 PM Cancel

gsk PARADE Study

You are eligible to join the study

You are invited to participate in a research study which will collect data on how your RA affects you.

Please tap the button below to begin the consent process.

Start Consent

# Consent Screens

Consent PDF Page 1

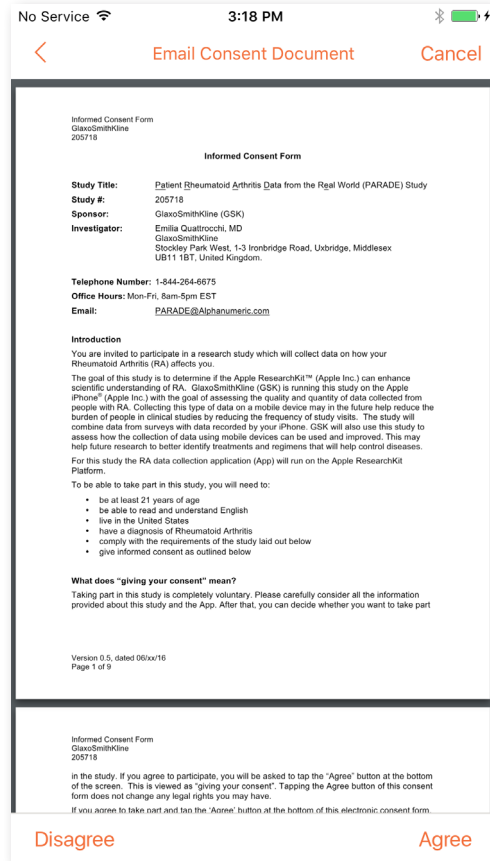

Consent PDF Page 2

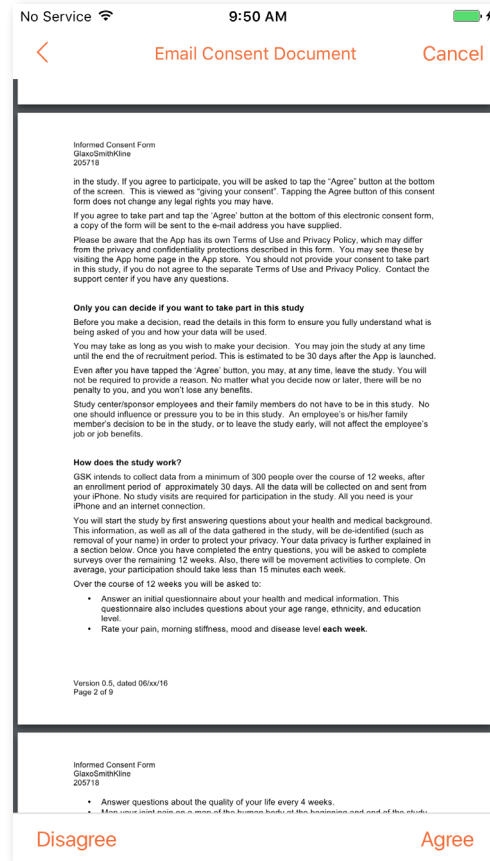

Consent PDF Page 3

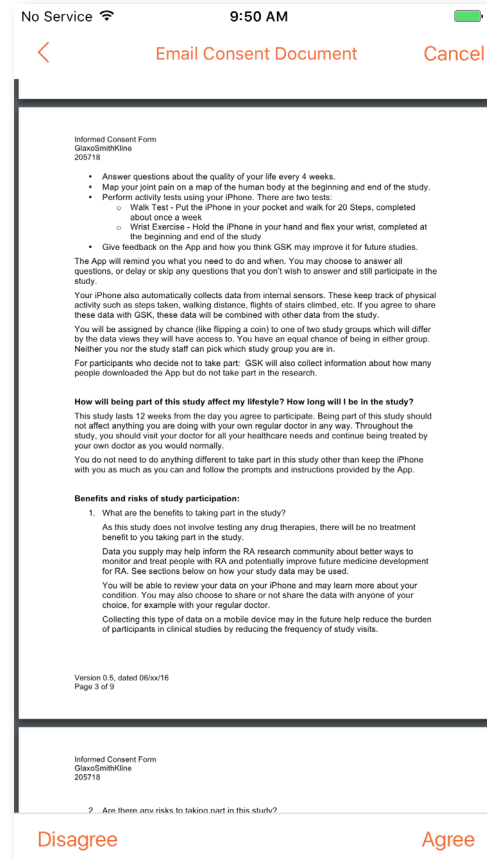

Consent PDF Page 4

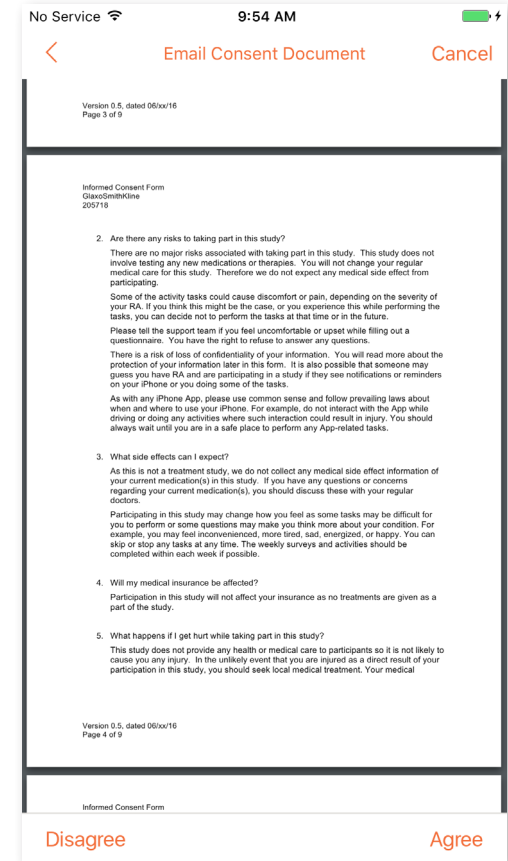

# Consent Screens, 2

Consent PDF Page 5

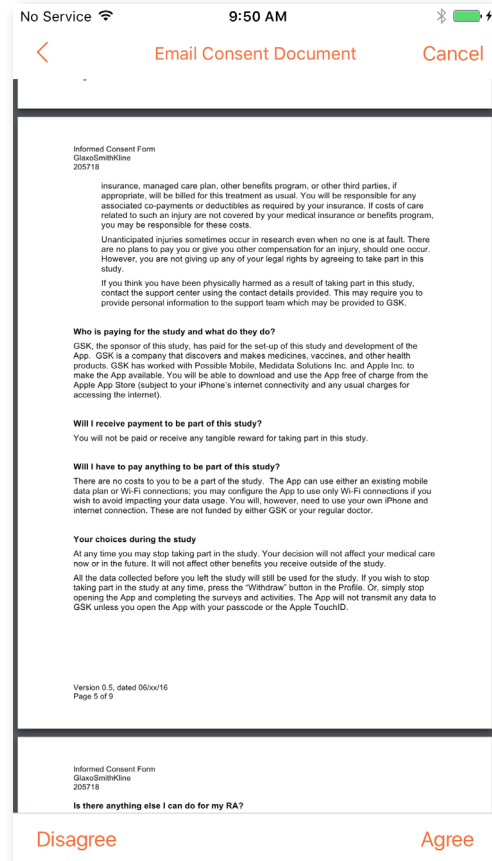

Consent PDF Page 6

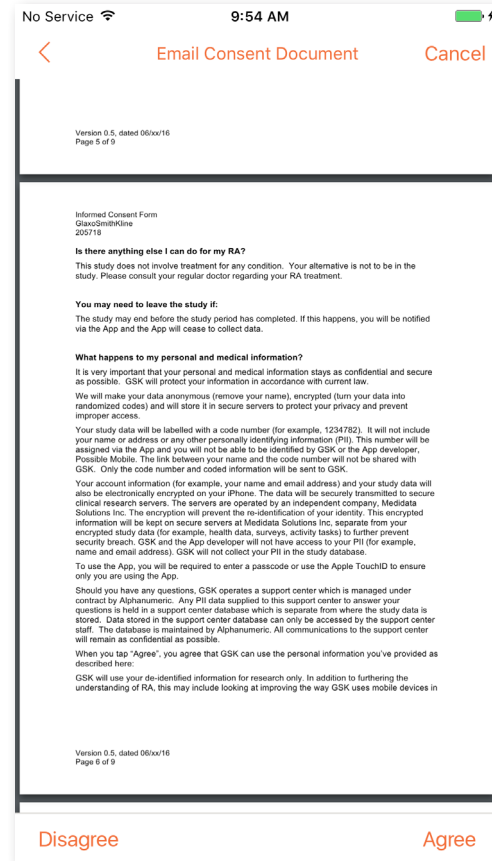

Consent PDF Page 7

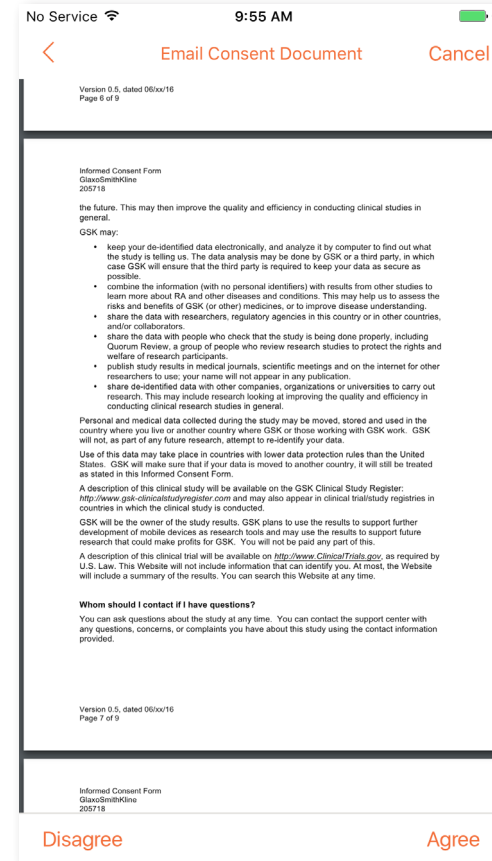

Consent PDF Page 8

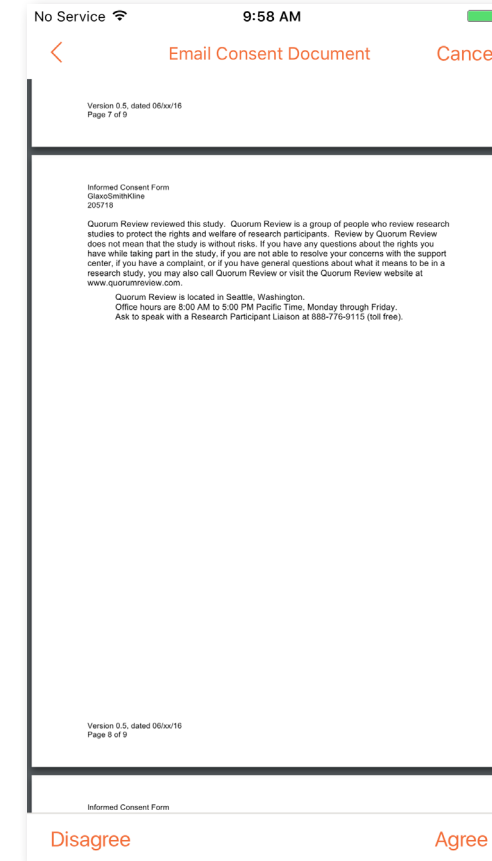

# Consent Screens, 3

Consent PDF Page 9

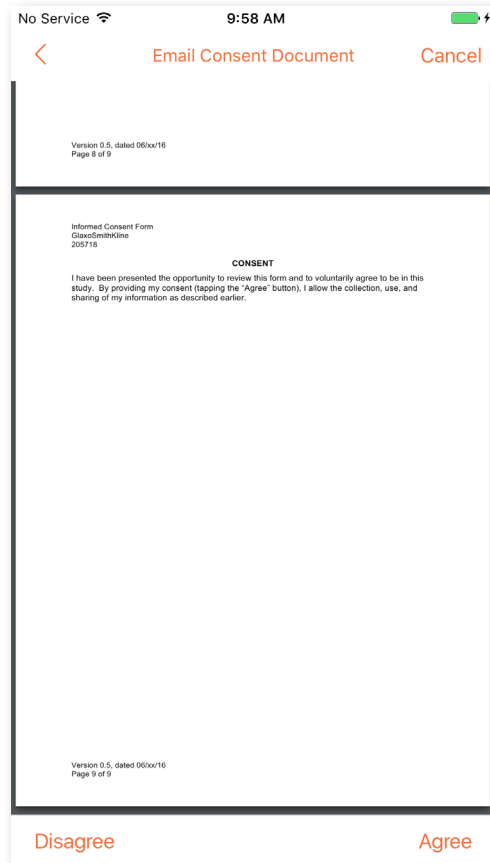

Consent Agree Notification

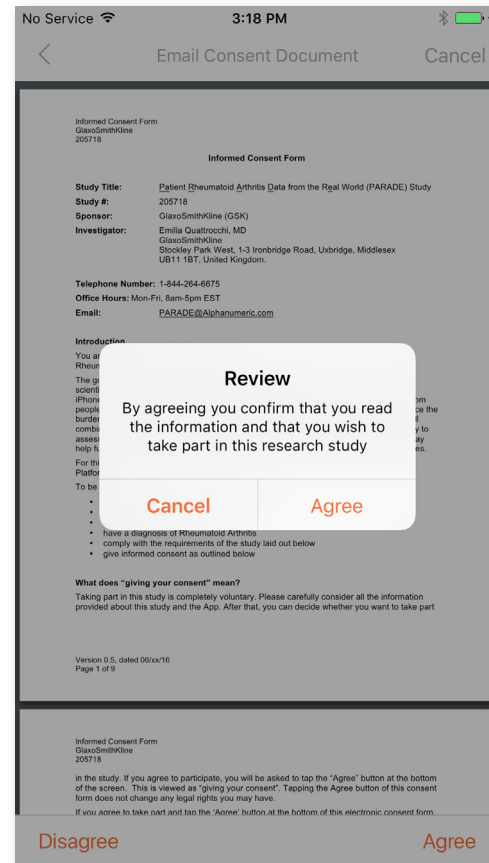

Consent Signature

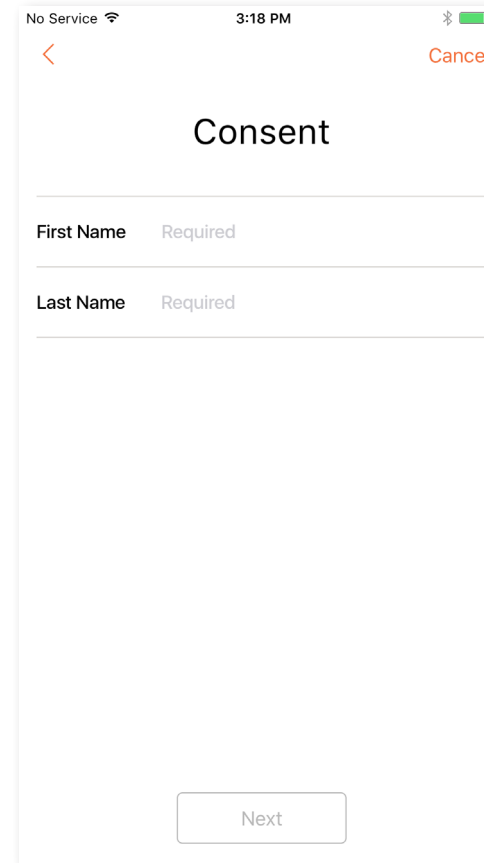

What to Expect

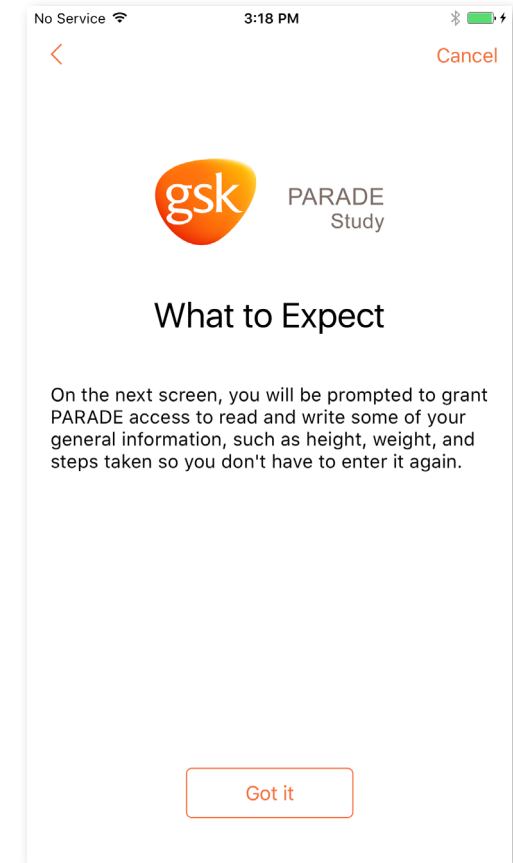

# Passcode Screens

Enter Passcode

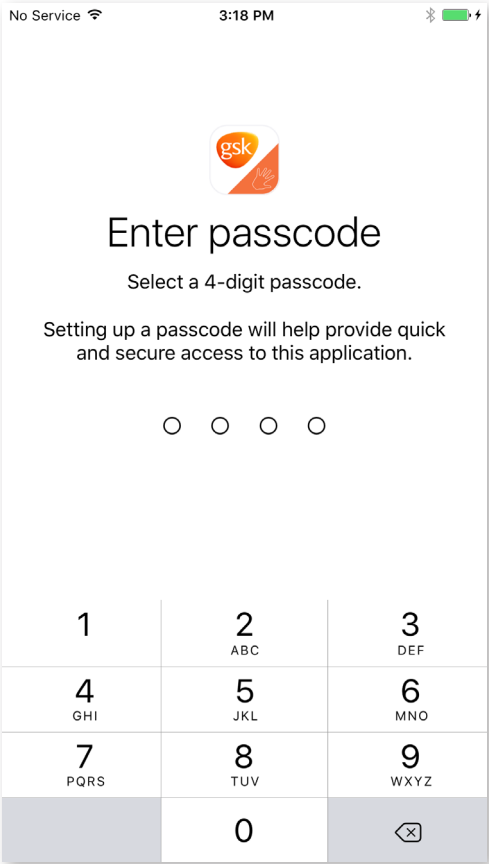

Confirm Passcode

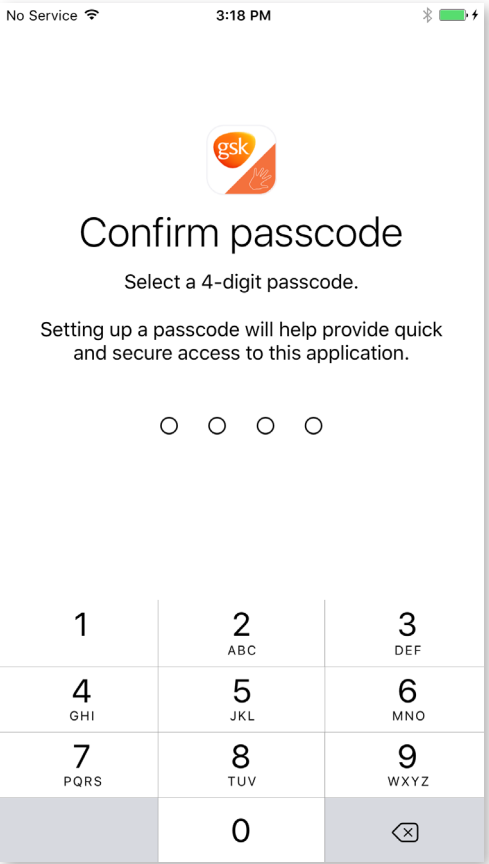

Passcode Saved / Touch ID prompt

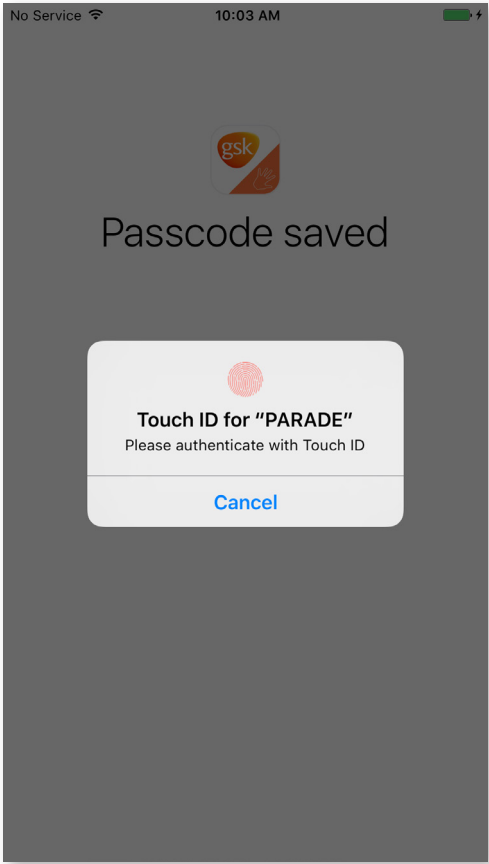

# Registration Screens

Create Profile

No Service 3:19 PM

Cancel Registration Submit

GSK will have no access to personal identifiable information. This is for verification purposes only.

Username (email address)

Confirm username

Password Add password ?

Choose security question

Security question answer

Birthdate Month Year

Male Female

Height Add height

Weight Add weight

Intro Survey

No Service 3:22 PM

Step 1 of 2 Cancel

Where did you first hear about this App?

Facebook

Inspire

HealthUnlocked

Other

Intro Survey Complete

No Service 3:22 PM

Step 2 of 2 Submit

Thank you!

You have completed the intro survey.

Please hit the Submit button to confirm your answers, or use the back arrow to make any changes.

Health and Medical History 1

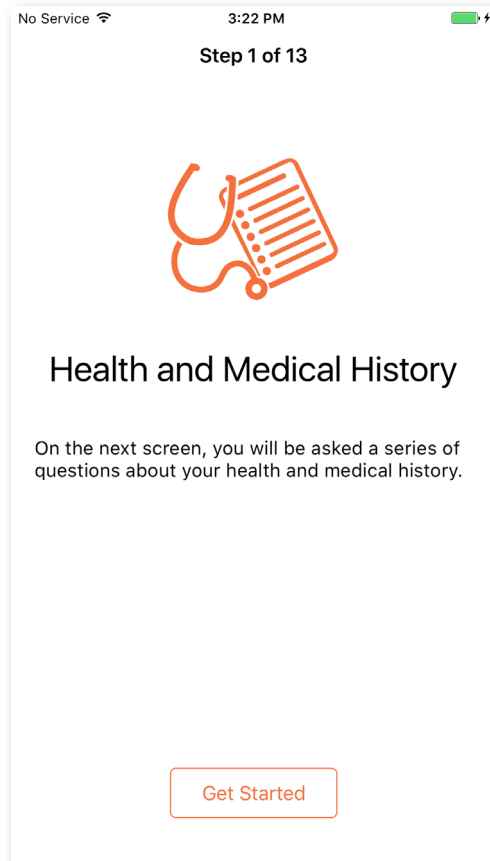

Health and Medical History 2

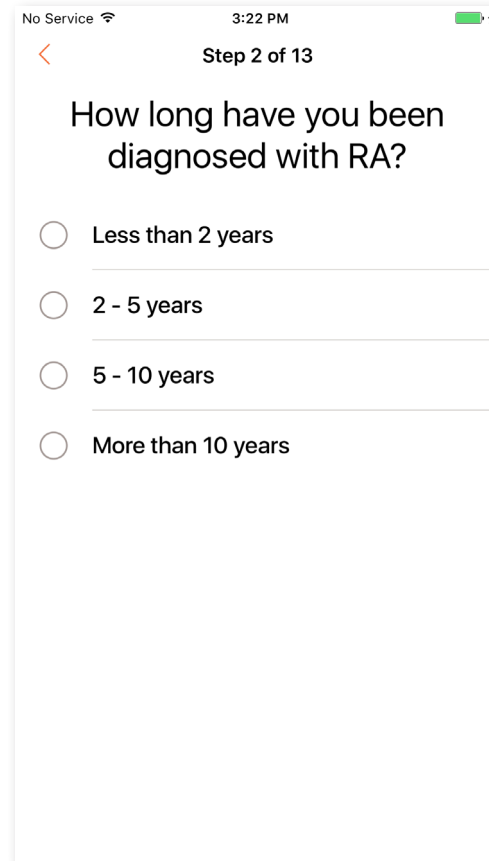

Health and Medical History 3

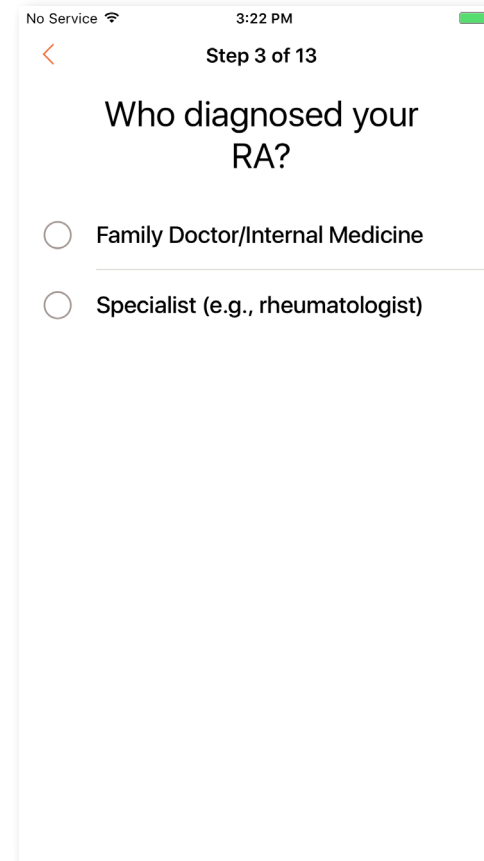

Health and Medical History 4

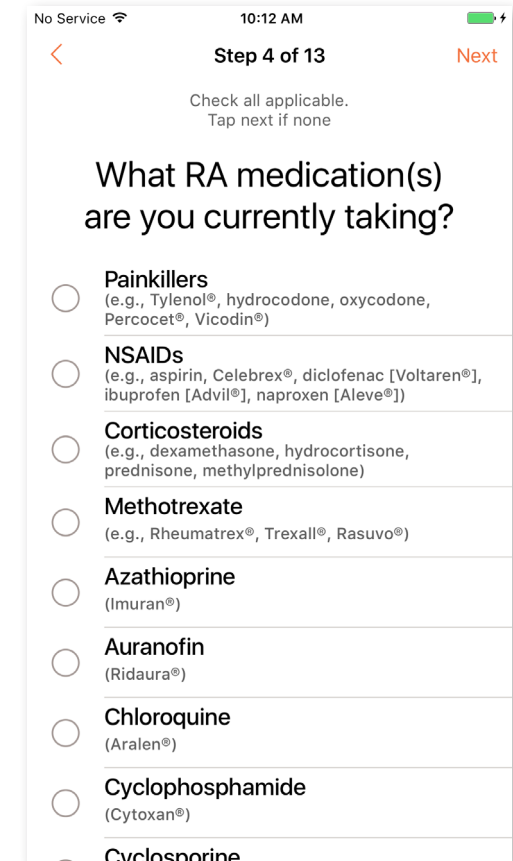

Health and Medical History 4 (cont.)

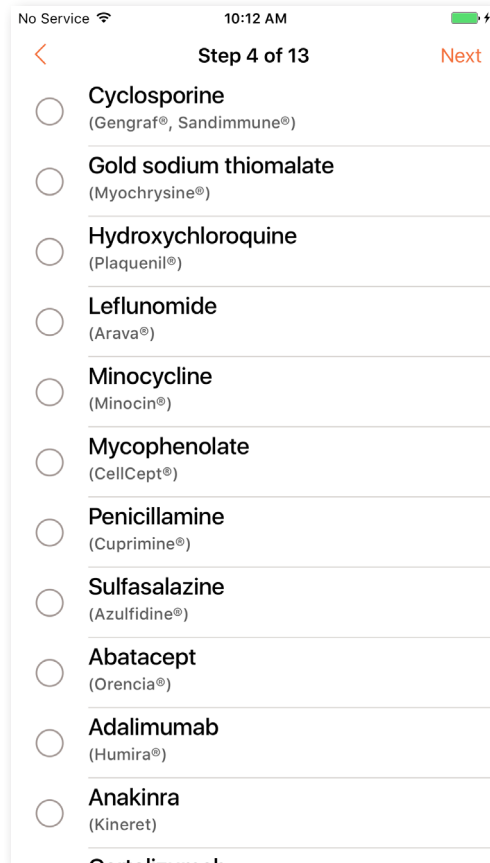

No Service 10:12 AM

Step 4 of 13 Next

- Cyclosporine (Gengraf®, Sandimmune®)
- Gold sodium thiomalate (Myochrysine®)
- Hydroxychloroquine (Plaquenil®)
- Leflunomide (Arava®)
- Minocycline (Minocin®)
- Mycophenolate (CellCept®)
- Penicillamine (Cuprimine®)
- Sulfasalazine (Azulfidine®)
- Abatacept (Orencia®)
- Adalimumab (Humira®)
- Anakinra (Kineret)
- Certolizumab

Health and Medical History 4 (cont.)

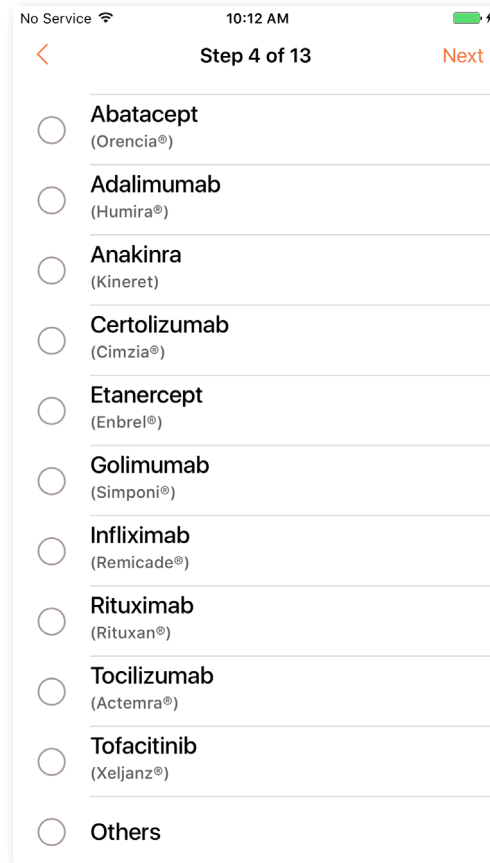

No Service 10:12 AM

Step 4 of 13 Next

- Abatacept (Orencia®)
- Adalimumab (Humira®)
- Anakinra (Kineret)
- Certolizumab (Cimzia®)
- Etanercept (Enbrel®)
- Golimumab (Simponi®)
- Infliximab (Remicade®)
- Rituximab (Rituxan®)
- Tocilizumab (Actemra®)
- Tofacitinib (Xeljanz®)
- Others

Health and Medical History 5

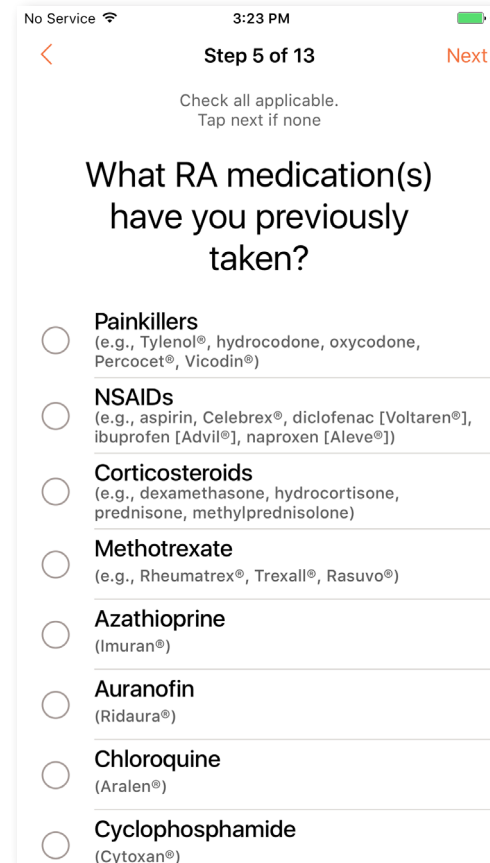

No Service 3:23 PM

Step 5 of 13 Next

Check all applicable. Tap next if none

What RA medication(s) have you previously taken?

- Painkillers (e.g., Tylenol®, hydrocodone, oxycodone, Percocet®, Vicodin®)
- NSAIDs (e.g., aspirin, Celebrex®, diclofenac [Voltaren®], ibuprofen [Advil®], naproxen [Aleve®])
- Corticosteroids (e.g., dexamethasone, hydrocortisone, prednisone, methylprednisolone)
- Methotrexate (e.g., Rheumatrex®, Trexall®, Rasuvo®)
- Azathioprine (Imuran®)
- Auranofin (Ridaura®)
- Chloroquine (Aralen®)
- Cyclophosphamide (Cytoxan®)

Health and Medical History 5 (cont.)

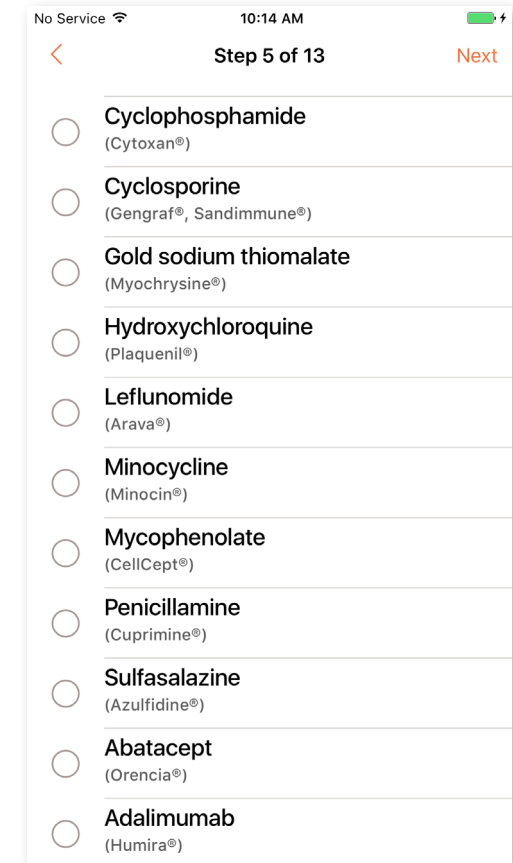

No Service 10:14 AM

Step 5 of 13 Next

- Cyclophosphamide (Cytoxan®)
- Cyclosporine (Gengraf®, Sandimmune®)
- Gold sodium thiomalate (Myochrysine®)
- Hydroxychloroquine (Plaquenil®)
- Leflunomide (Arava®)
- Minocycline (Minocin®)
- Mycophenolate (CellCept®)
- Penicillamine (Cuprimine®)
- Sulfasalazine (Azulfidine®)
- Abatacept (Orencia®)
- Adalimumab (Humira®)



## Health and Medical History 5 (cont.)

No Service 10:14 AM

< Step 5 of 13 Next

- Abatacept (Orencia®)
- Adalimumab (Humira®)
- Anakinra (Kineret)
- Certolizumab (Cimzia®)
- Etanercept (Enbrel®)
- Golimumab (Simponi®)
- Infliximab (Remicade®)
- Rituximab (Rituxan®)
- Tocilizumab (Actemra®)
- Tofacitinib (Xeljanz®)
- Others

## Health and Medical History 6

No Service 3:23 PM

< Step 6 of 13

What is your ethnicity?

- Caucasian
- African-American
- Hispanic
- Asian
- Other

## Health and Medical History 7

No Service 3:23 PM

< Step 7 of 13

Smoking History:

- Current smoker
- Previous smoker
- Never smoked

## Health and Medical History 8

No Service 3:23 PM

< Step 8 of 13

What is the highest level of education you have achieved?

- Middle school or below
- High school
- College
- Graduate school

Health and Medical History 9

No Service 3:23 PM

Step 9 of 13 Next

Check all applicable.  
Tap next if none

Do you have other medical conditions?

- Fibromyalgia
- Osteoarthritis
- Recent knee surgery  
(within past 6 months)
- Depression
- Hypertension
- Heart problems
- Asthma
- COPD
- Diabetes

Health and Medical History 9 (cont.)

No Service 10:17 AM

Step 9 of 13 Next

DO you have other medical conditions?

- Fibromyalgia
- Osteoarthritis
- Recent knee surgery  
(within past 6 months)
- Depression
- Hypertension
- Heart problems
- Asthma
- COPD
- Diabetes
- Other

Health and Medical History 10

No Service 3:23 PM

Step 10 of 13 Next

Check all applicable.  
Tap next if none

Which RA symptoms bother you the most?

- Joint pain
- Mood variations
- Morning stiffness
- Fatigue
- Poor sleep
- Walk and balance

Health and Medical History 11

No Service 3:23 PM

Step 11 of 13

If you could choose, how often would you like to see your study data?

- Daily
- Weekly
- Monthly
- At the end of the study
- No preference

## Health and Medical History 12

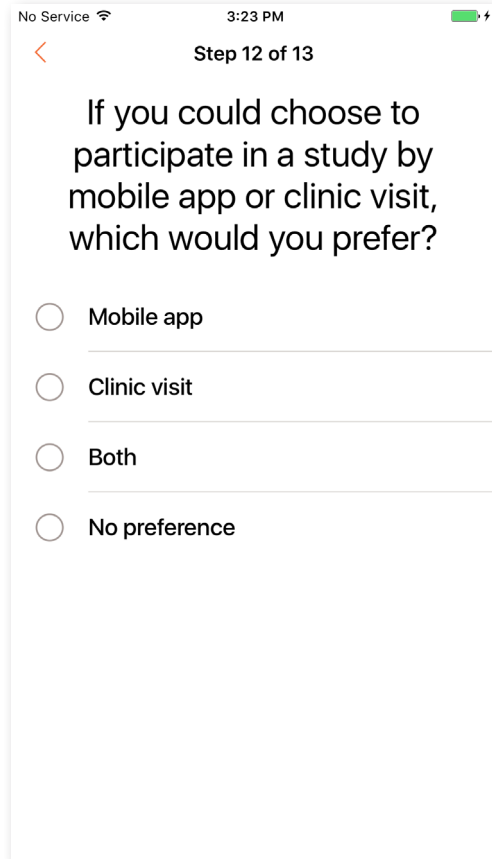

No Service 3:23 PM

< Step 12 of 13

If you could choose to participate in a study by mobile app or clinic visit, which would you prefer?

- Mobile app
- Clinic visit
- Both
- No preference

## Health and Medical History 13 (cont.)

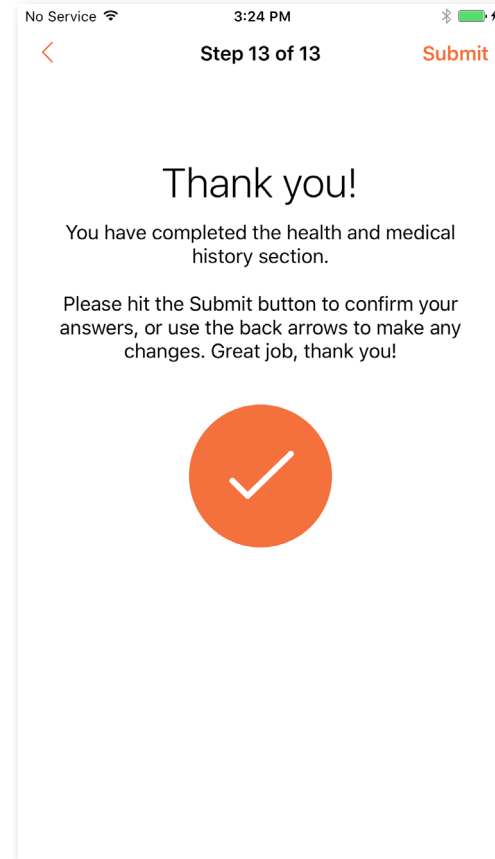

No Service 3:24 PM

< Step 13 of 13 Submit

Thank you!

You have completed the health and medical history section.

Please hit the Submit button to confirm your answers, or use the back arrows to make any changes. Great job, thank you!



# Task List & Badges Screens

Task List

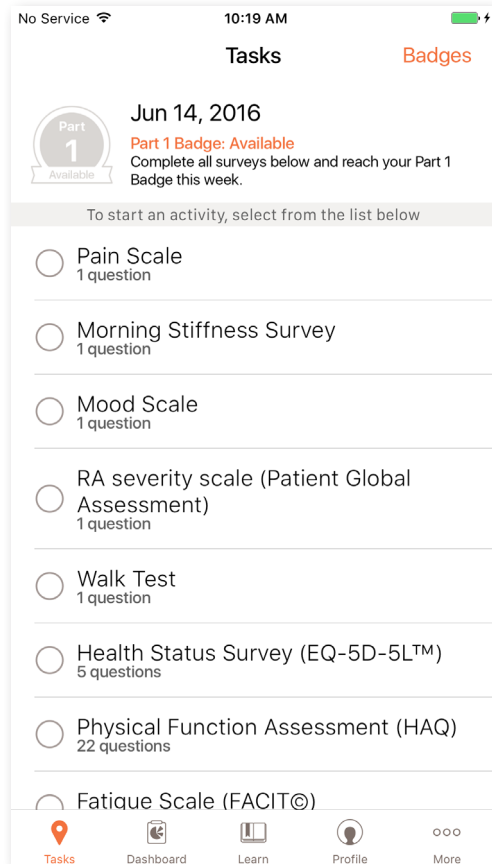

Task List (cont.)

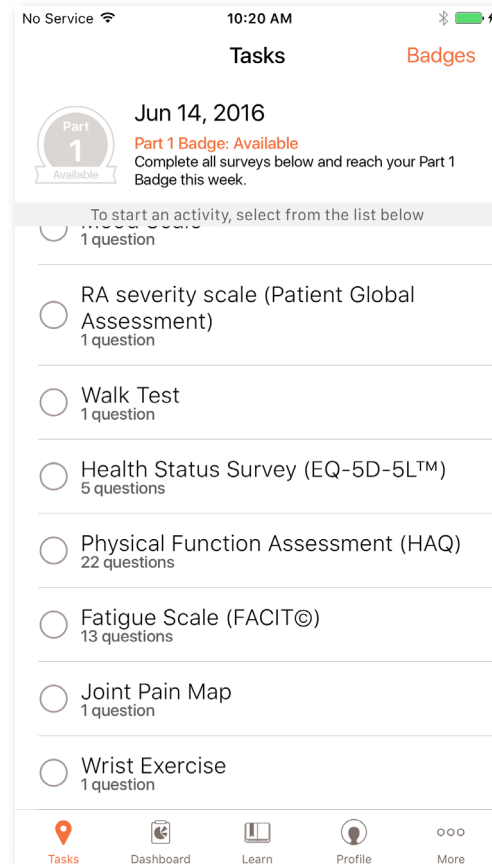

Badges

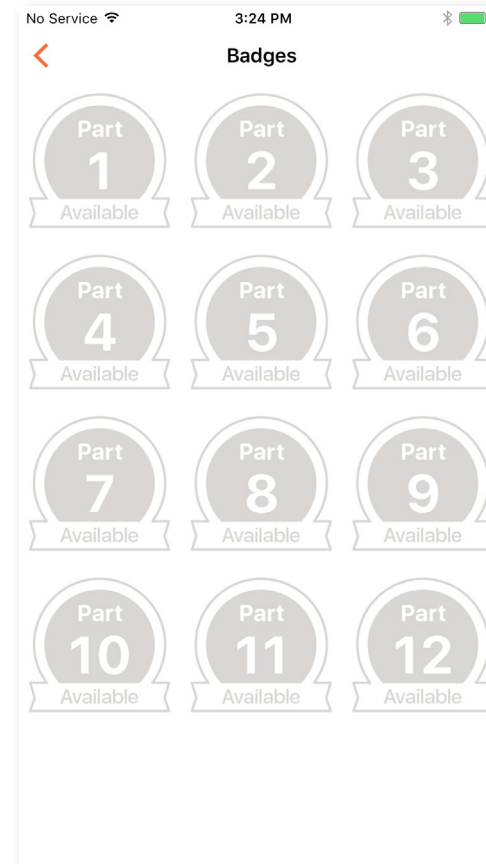

# Dashboard Screens

Dashboard Group B

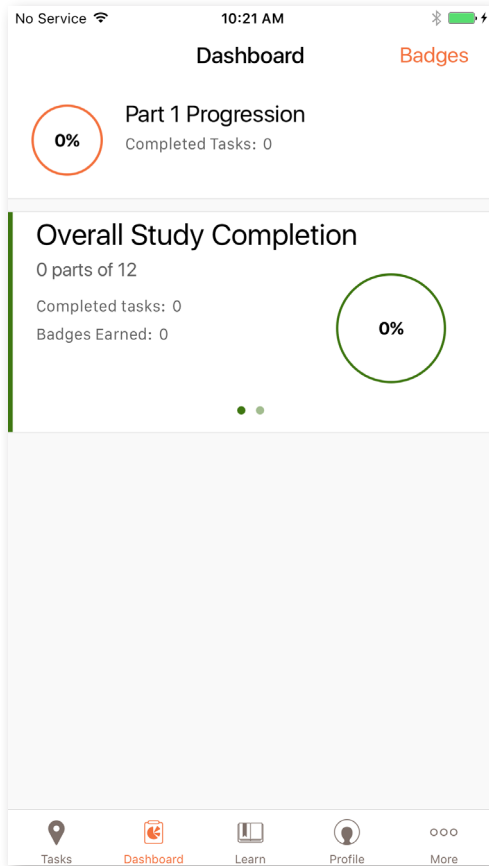

Dashboard Group B (cont.)

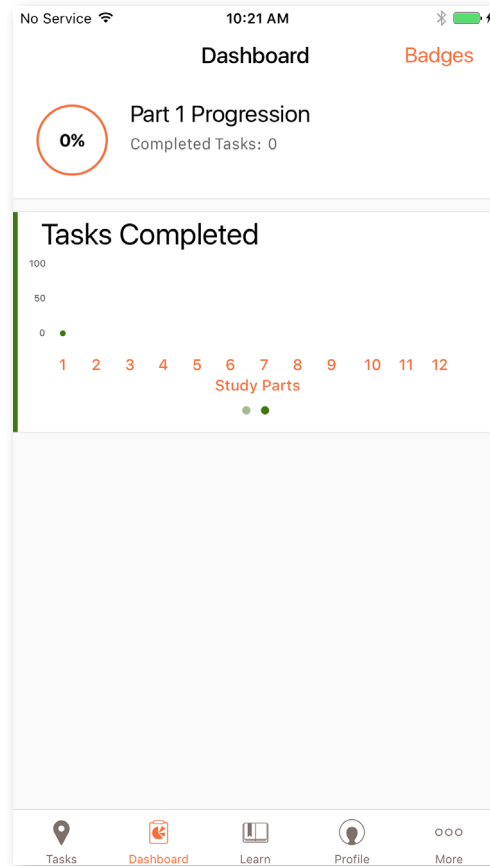

Dashboard Group A

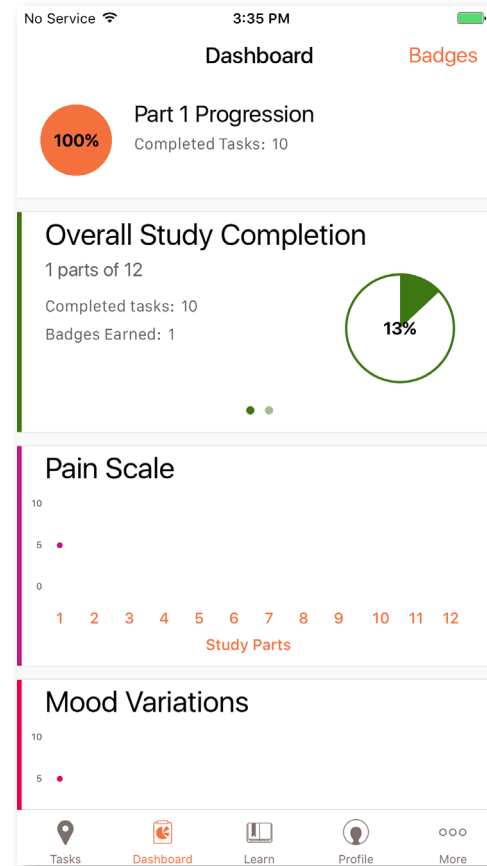

Dashboard Group A (cont.)

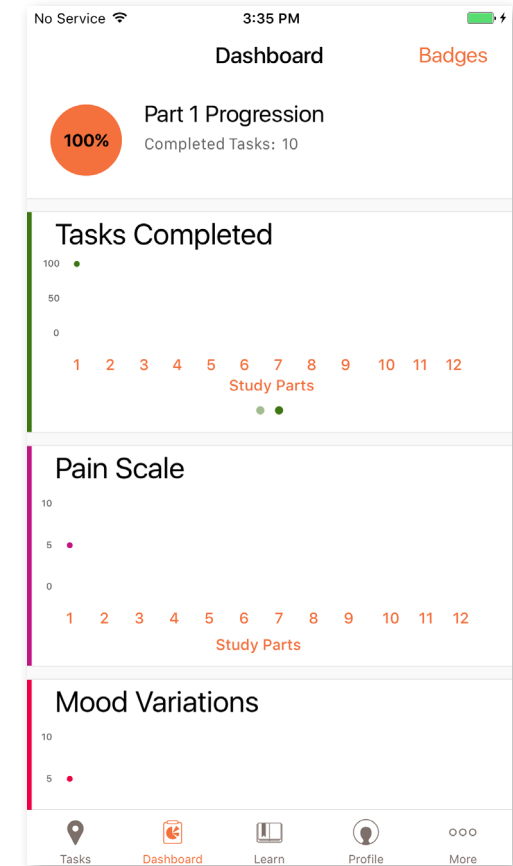

# Dashboard Screens, 2

Dashboard Group A (cont.)

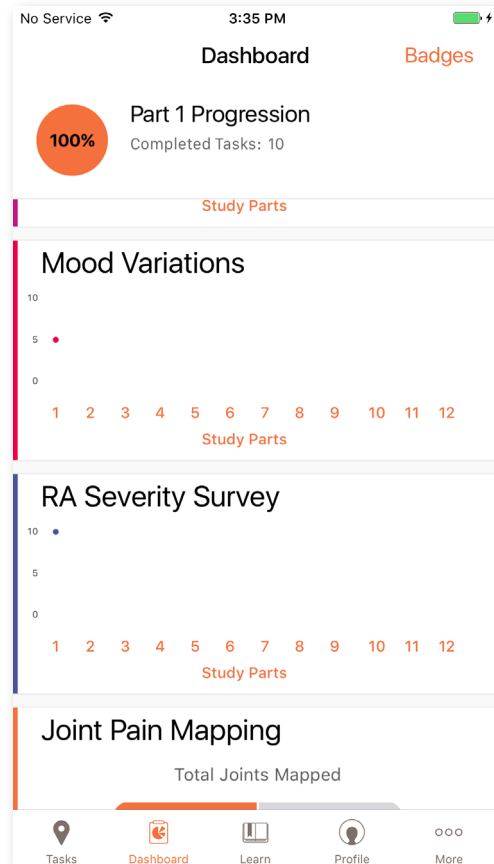

Dashboard Group A (cont.)

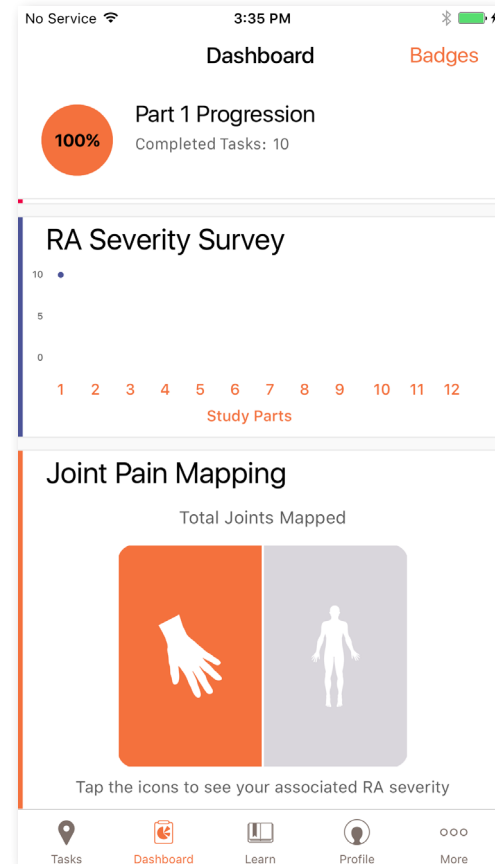

Dashboard Group A (cont.)

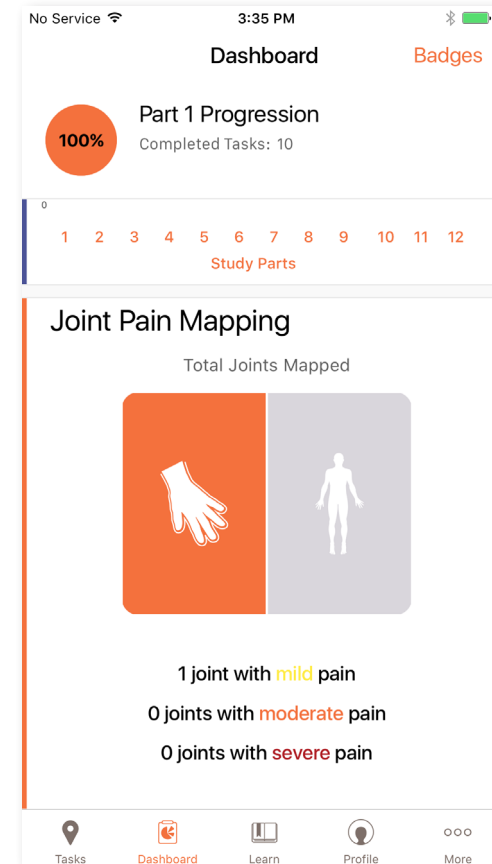

Dashboard Group A (cont.)

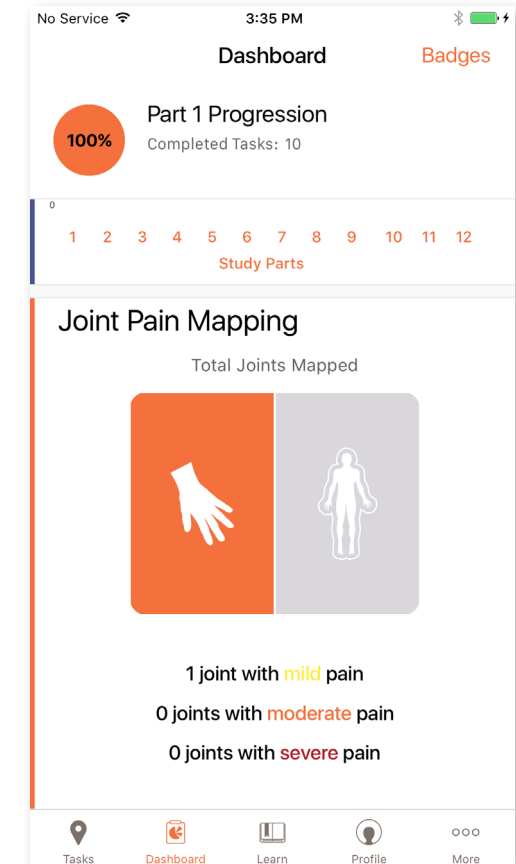

Learn Screen

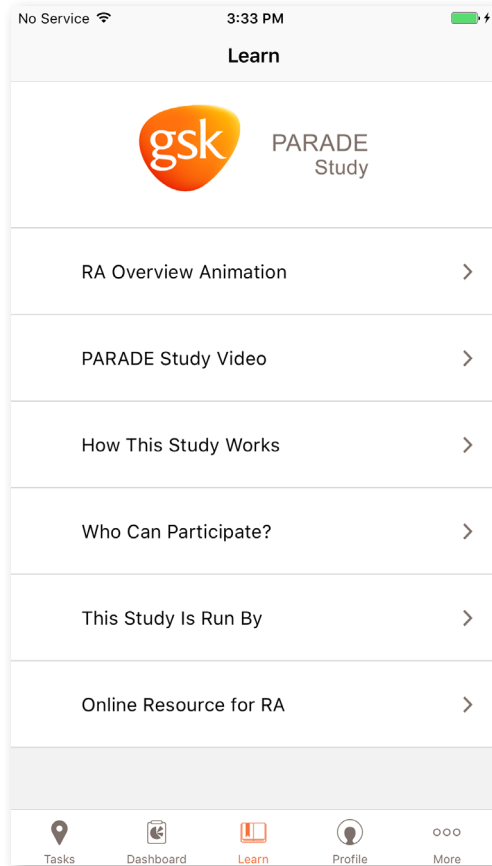

RA Overview Animation Screen

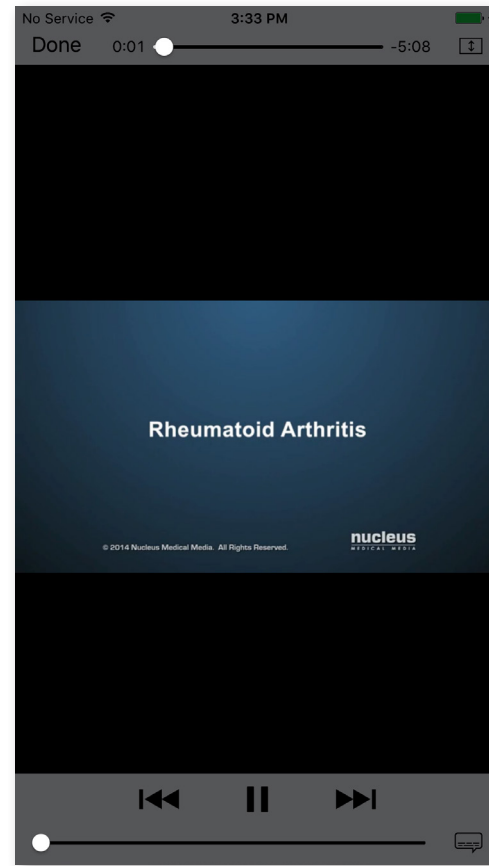

PARADE Study Video

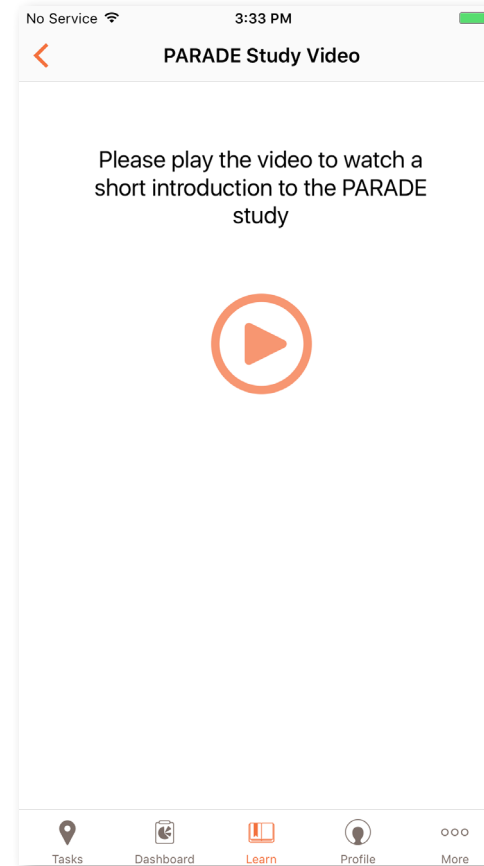

How This Study Works

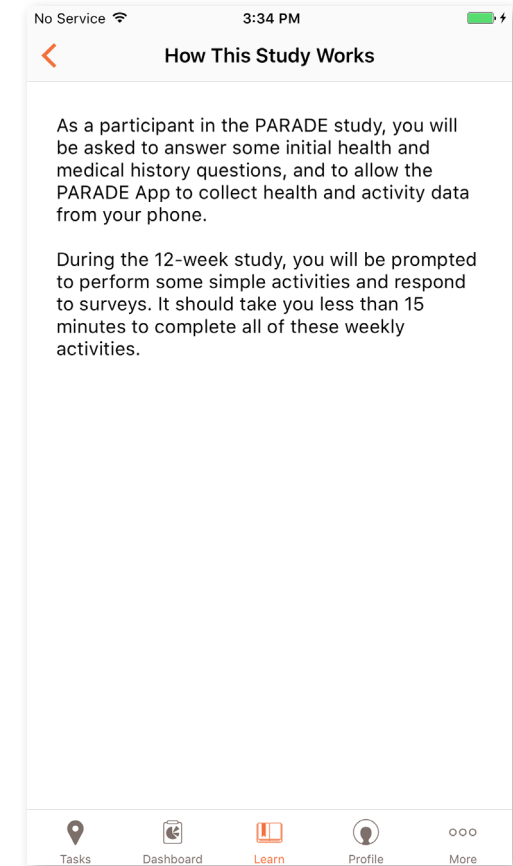

Who Can Participate

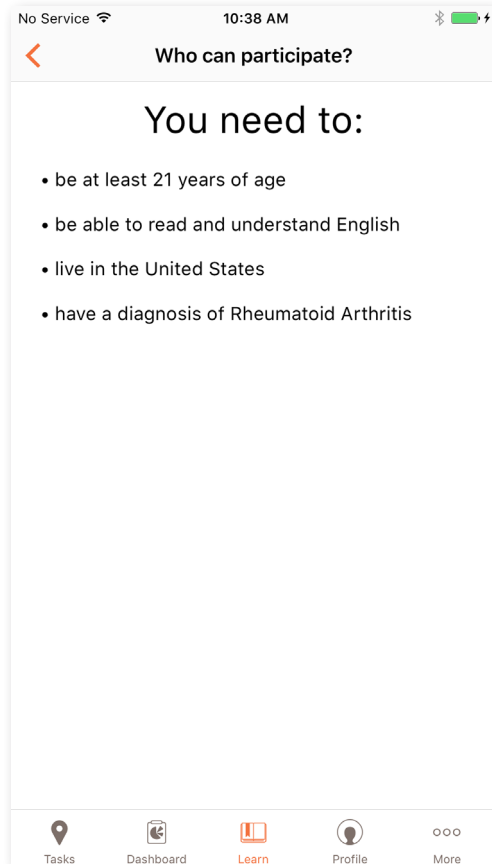

This Study Is Run By

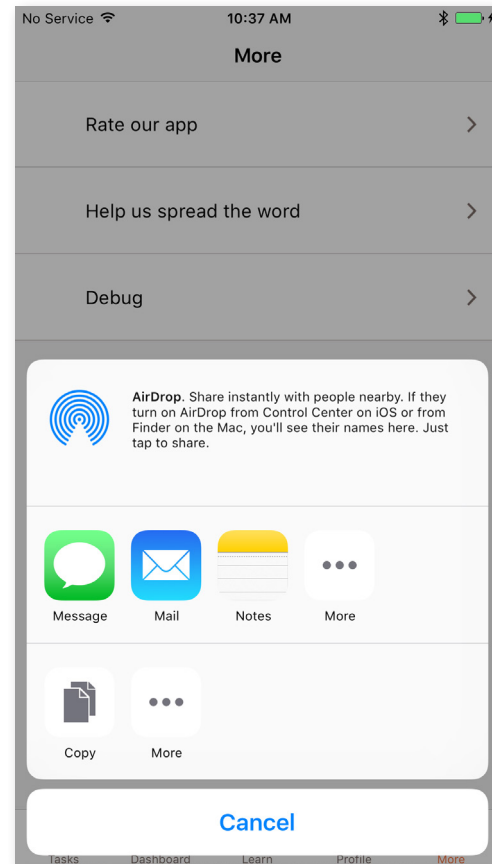

Online Resource for RA

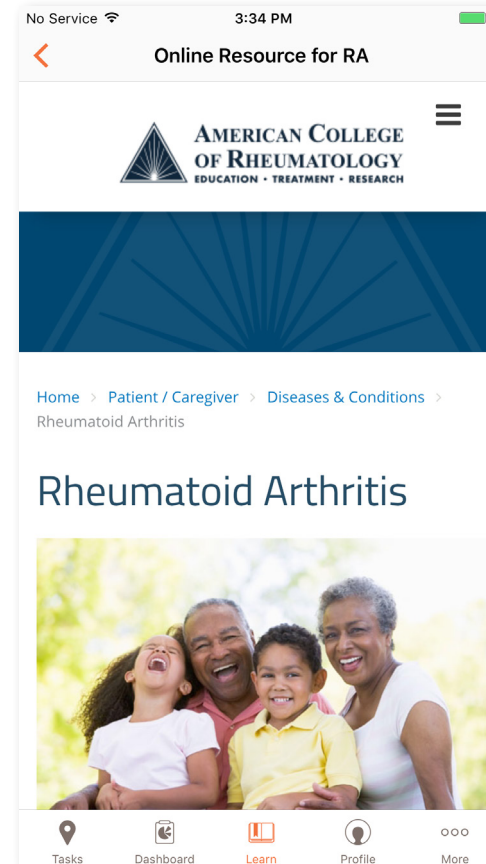

Online Resource for RA (cont.)

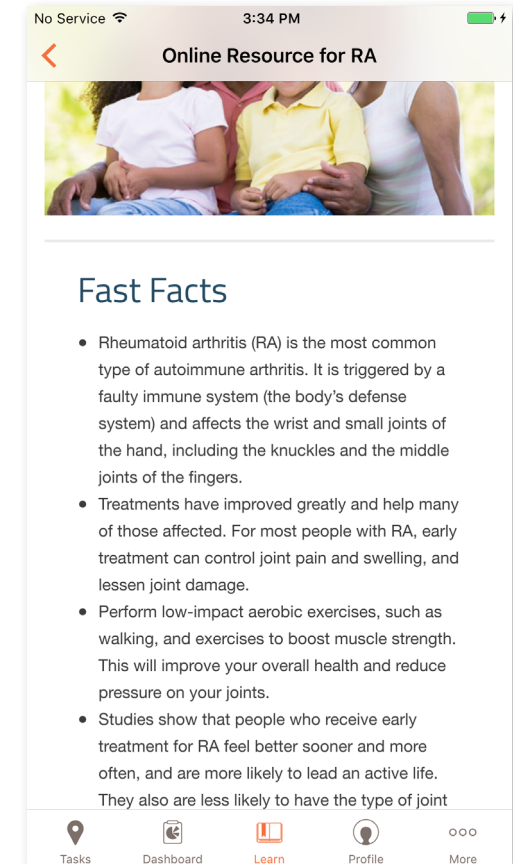



Online Resource for RA (cont.)

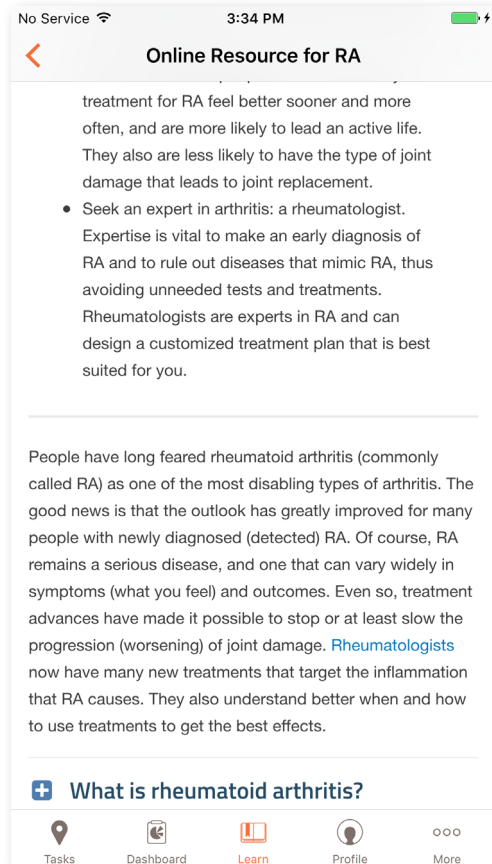

Online Resource for RA (cont.)

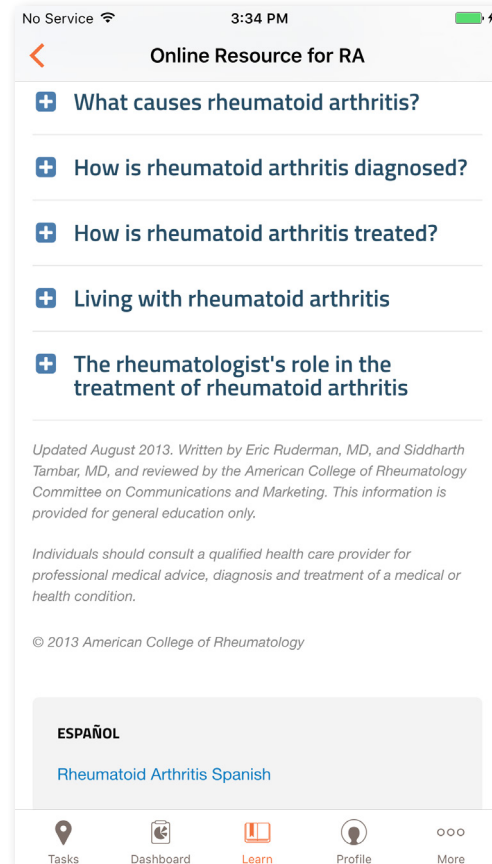

Online Resource for RA (cont.)

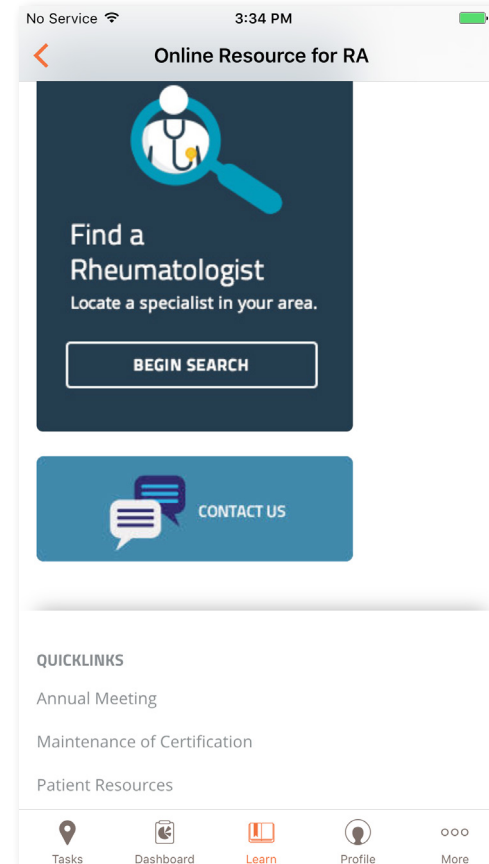

# Profile & More Screens

Profile View

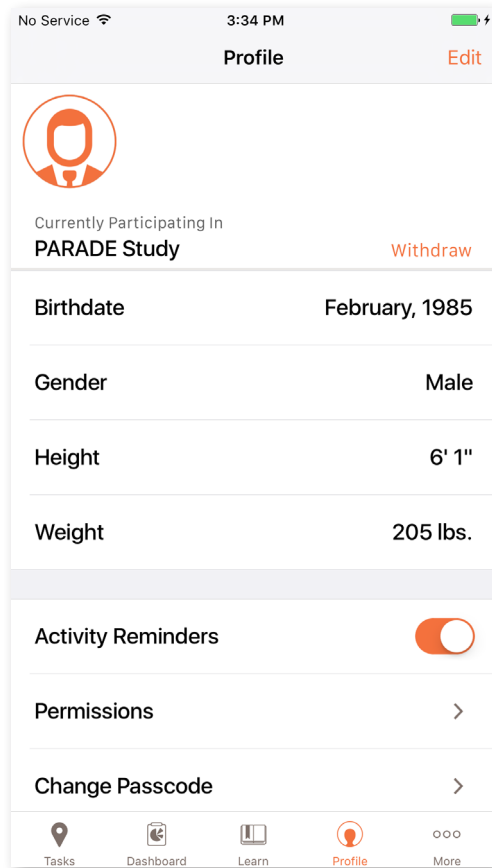

More View

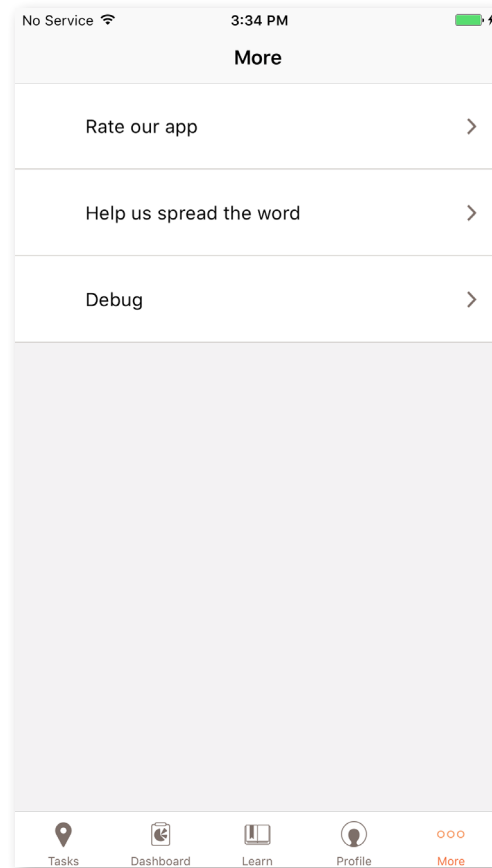

Spread the Word Dialog

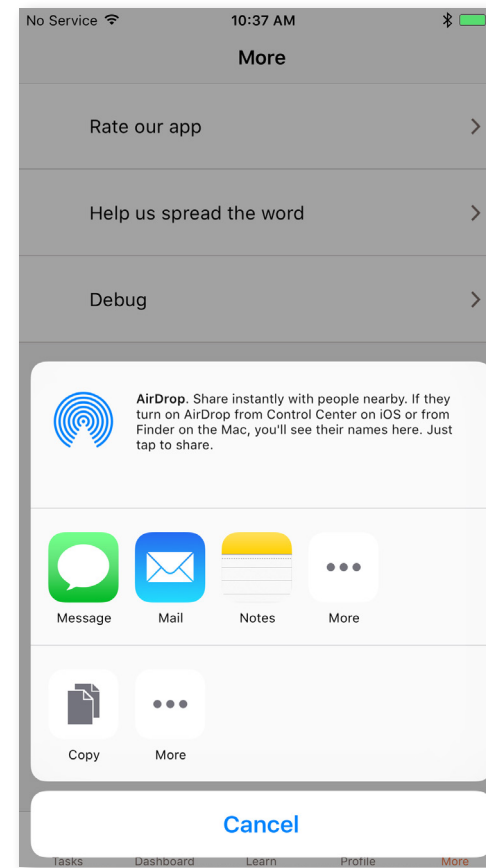

# Pain Scale Screens

Pain Scale 1

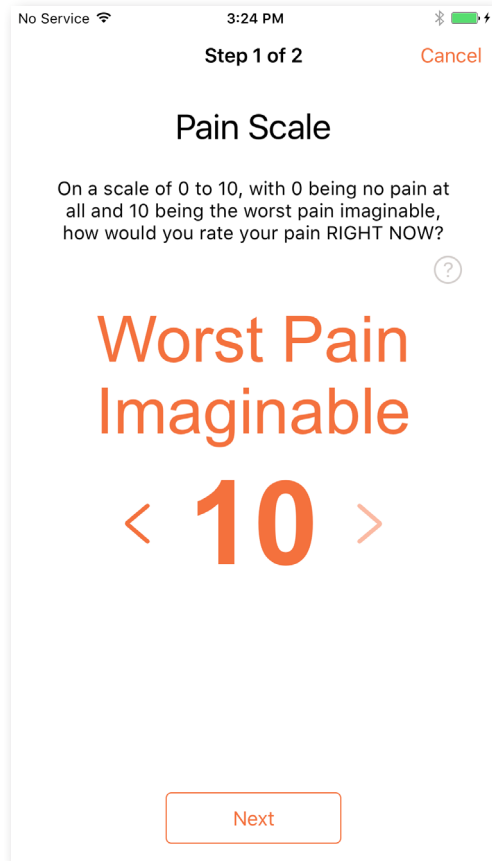

Pain Scale: More Info

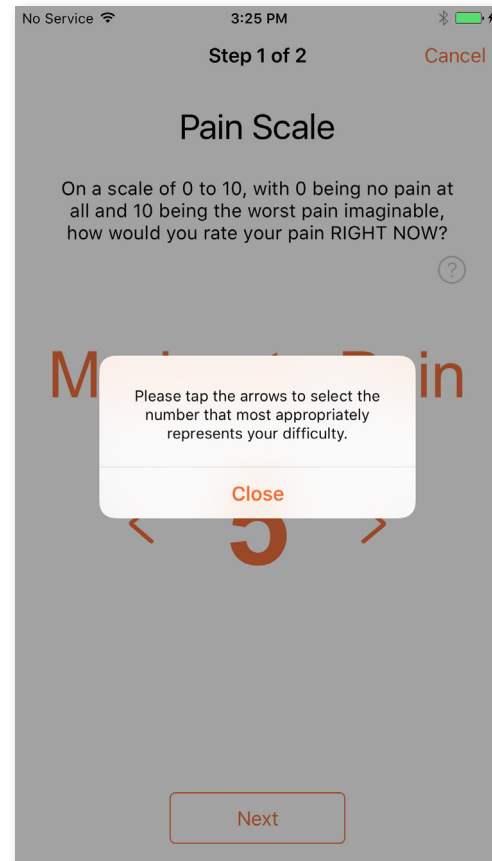

Pain Scale 2

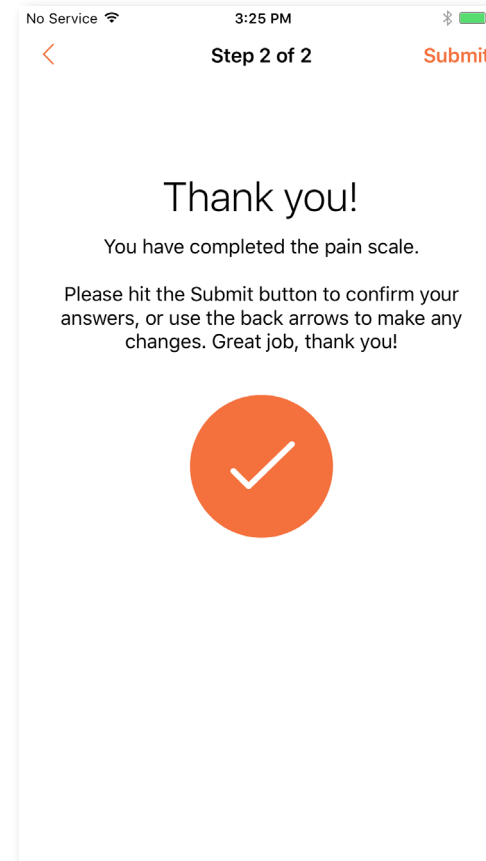

# Morning Stiffness Screens

Morning Stiffness Survey 1

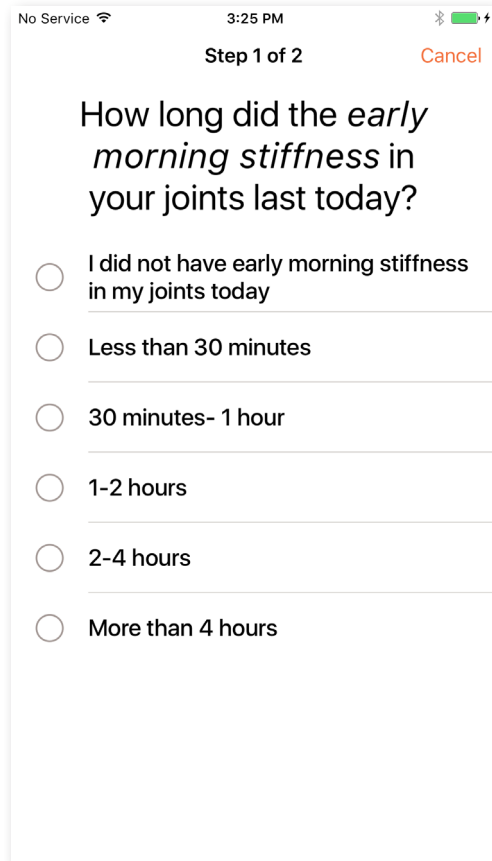

A mobile app screenshot showing the first step of a survey. The status bar at the top indicates 'No Service', '3:25 PM', and battery level. The screen title is 'Step 1 of 2' with a 'Cancel' button. The question is 'How long did the *early morning stiffness* in your joints last today?'. Below the question are six radio button options: 'I did not have early morning stiffness in my joints today', 'Less than 30 minutes', '30 minutes- 1 hour', '1-2 hours', '2-4 hours', and 'More than 4 hours'.

Morning Stiffness Survey 2

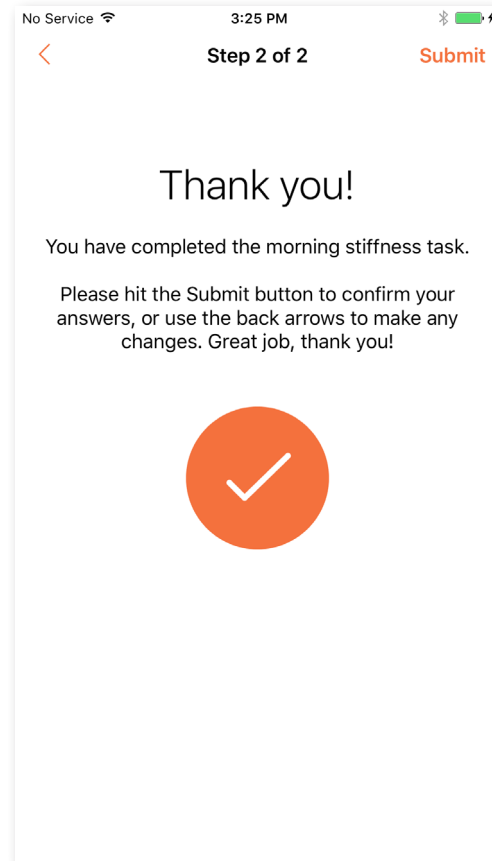

A mobile app screenshot showing the second step of the survey. The status bar at the top indicates 'No Service', '3:25 PM', and battery level. The screen title is 'Step 2 of 2' with a 'Submit' button. The text reads 'Thank you!' followed by 'You have completed the morning stiffness task.' and 'Please hit the Submit button to confirm your answers, or use the back arrows to make any changes. Great job, thank you!'. At the bottom center is a large orange circle containing a white checkmark.

# Mood Scale Screens

Mood Scale 1

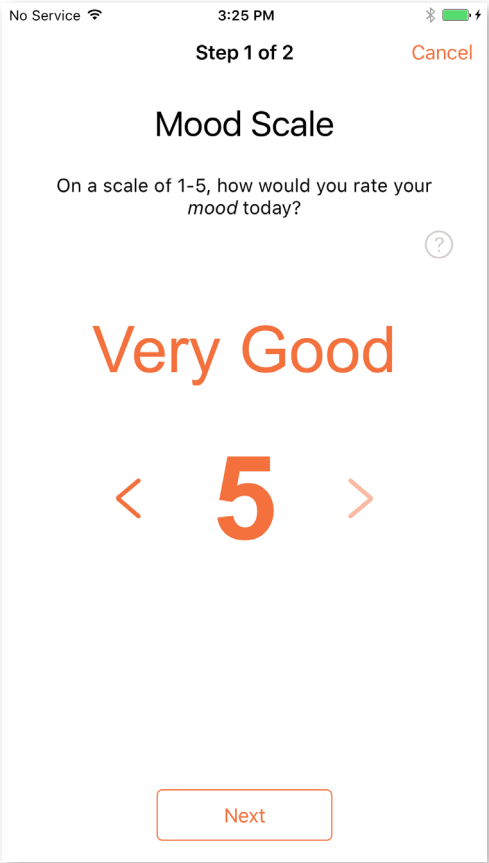

Mood Scale: More Info

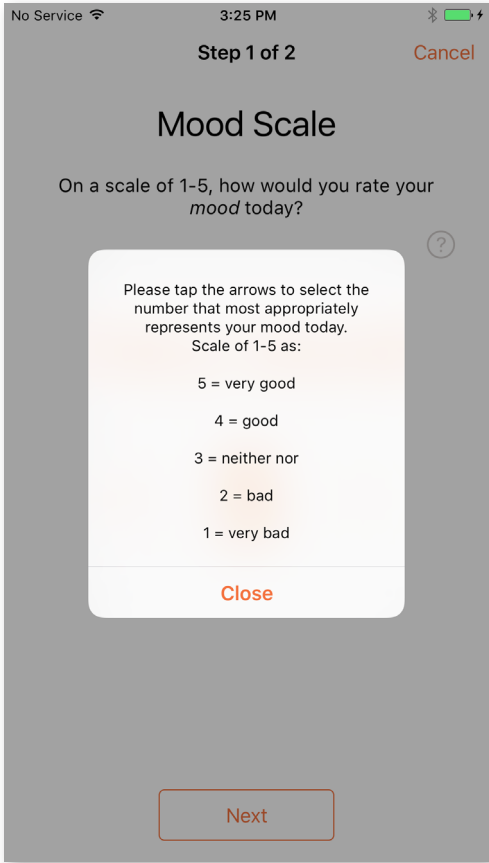

Mood Scale 2

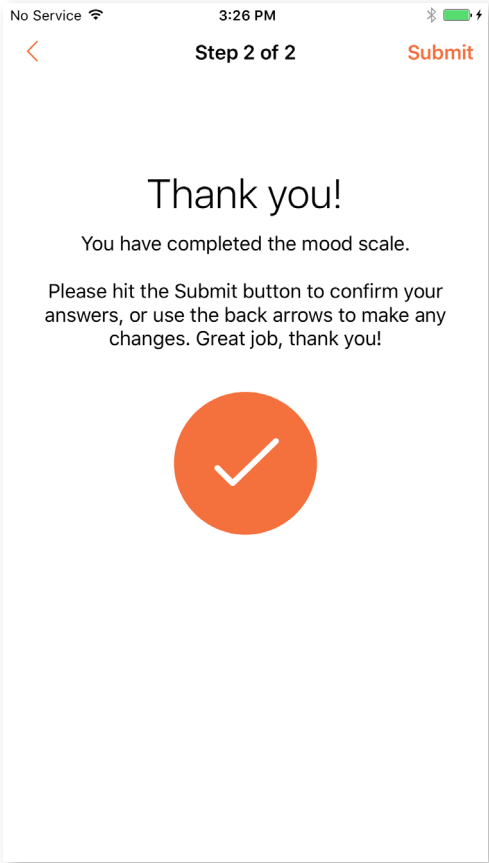

# RA Severity Scale Screens

RA Severity Scale 1

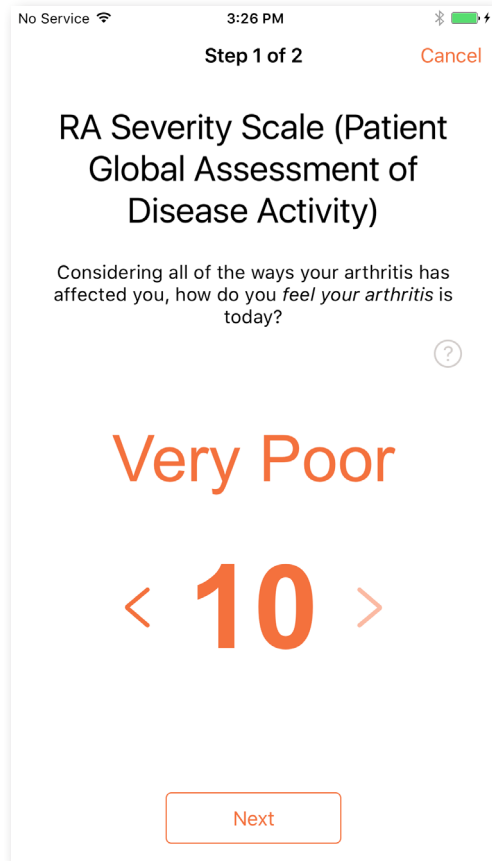

RA Severity Scale: More Info

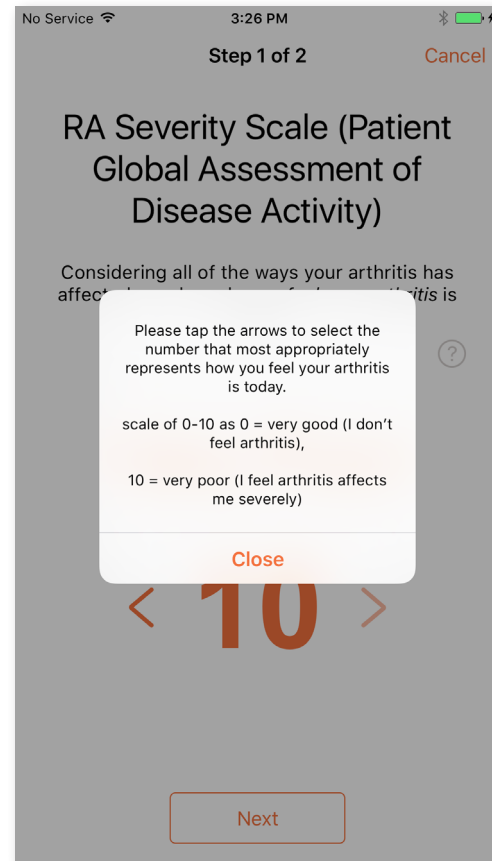

RA Severity Scale 2

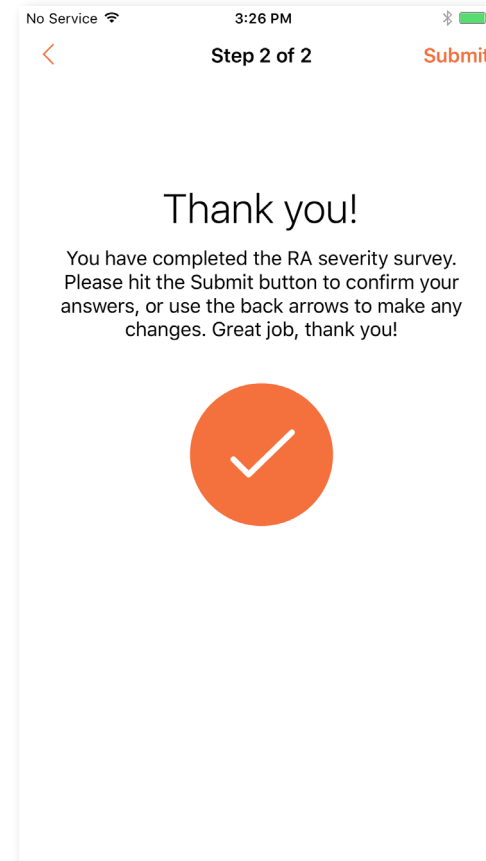

# Walk Test Screens

Walk Test 1

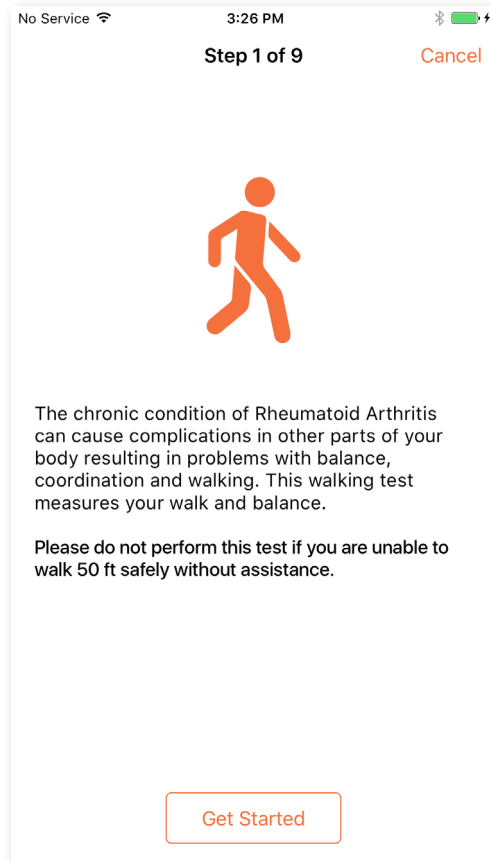

Walk Test 2

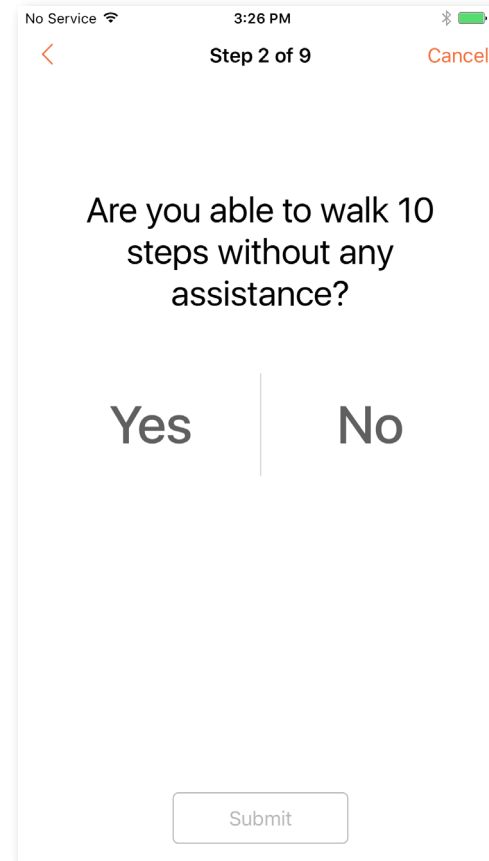

Walk Test: Do Not Need To Complete

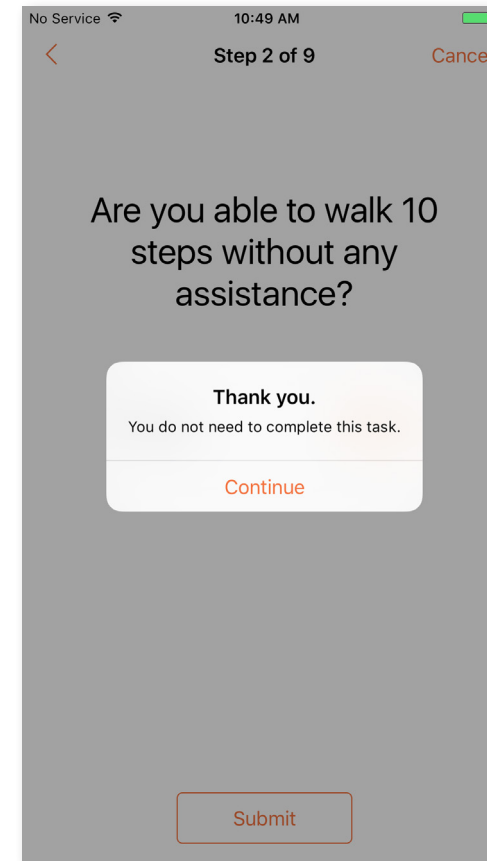

Walk Test 3

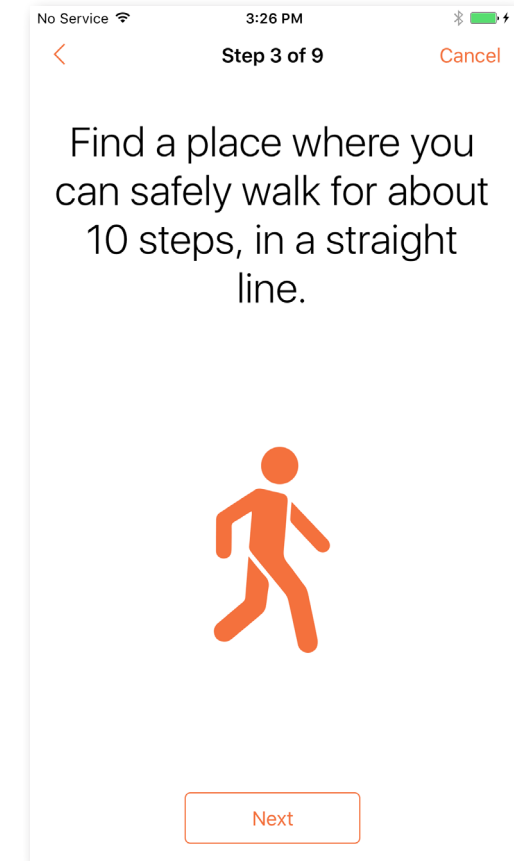

# Walk Test Screens, 2

Walk Test 4

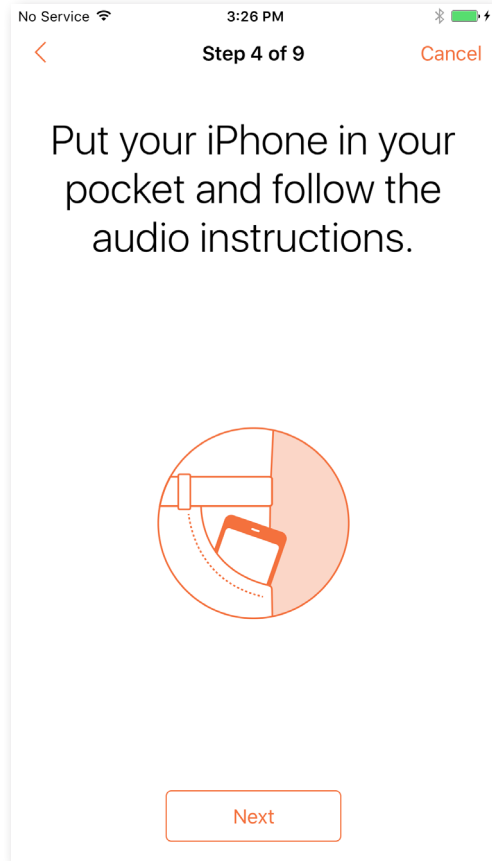

Walk Test 5

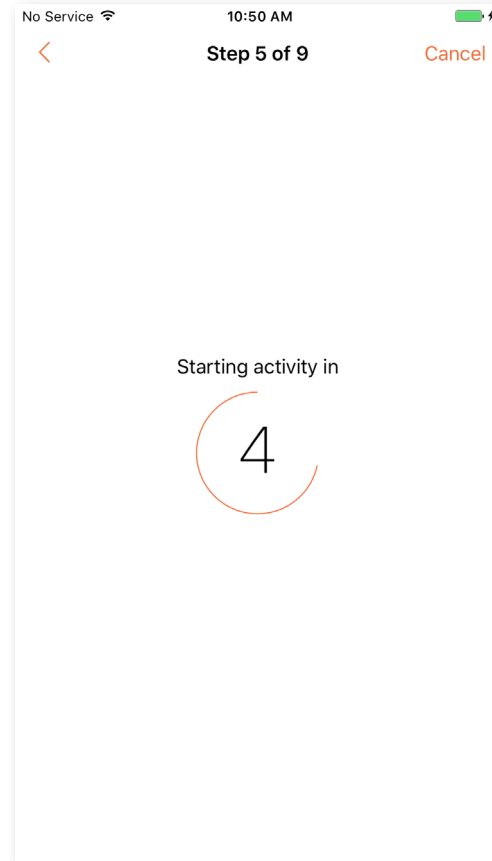

Walk Test 6

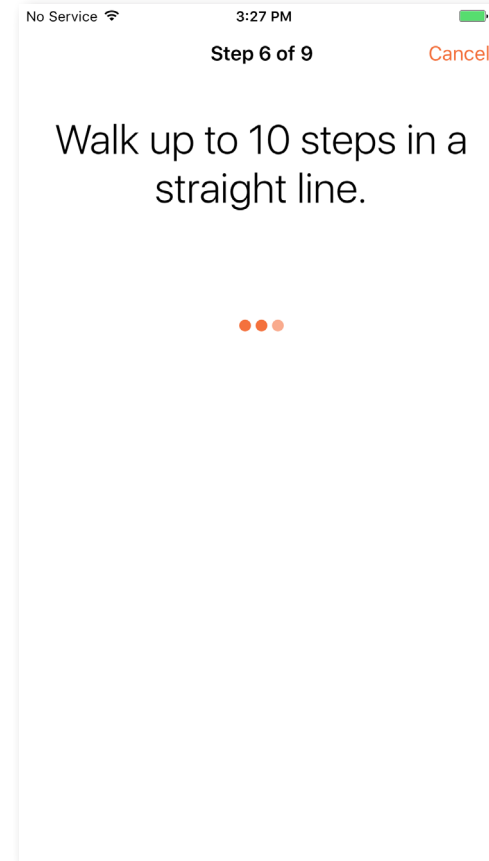

Walk Test 7

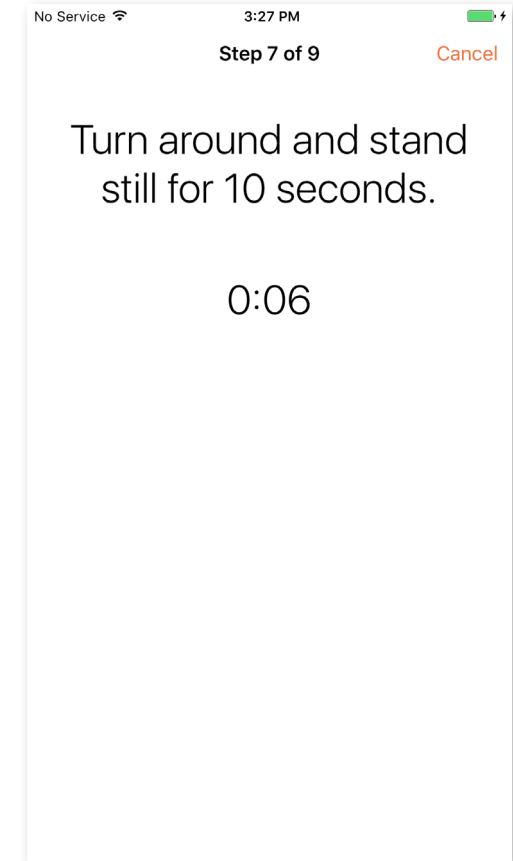



# Walk Test Screens, 3

Walk Test 8

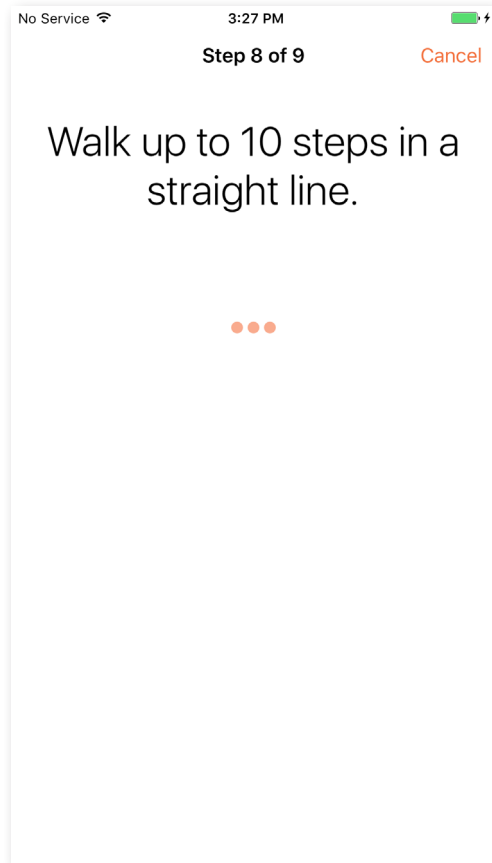

Walk Test 9

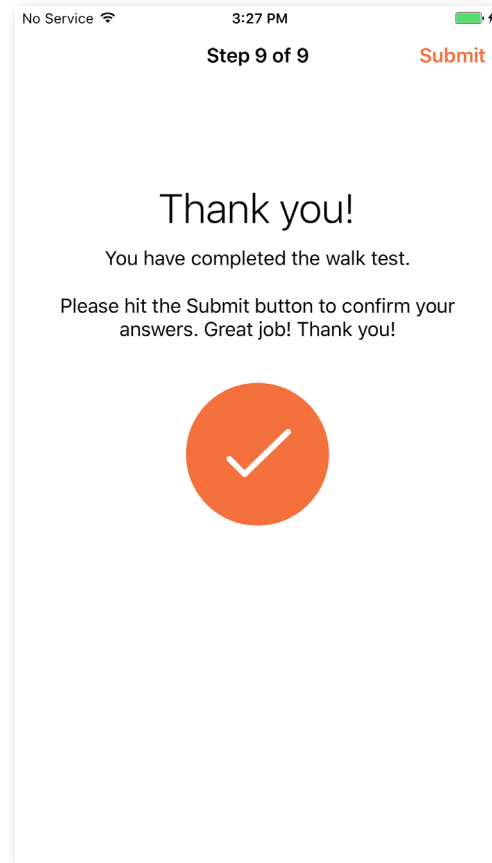

# Health Status Survey Screens

EQ-5D-5L 1

No Service 3:27 PM

Step 1 of 8 Cancel

  
**EQ-5D-5L**

Health Questionnaire

English version for the USA

Get Started

© EuroQol research Foundation, EQ-5D

EQ-5D-5L 2

No Service 3:27 PM

Step 2 of 8 Cancel

Please select the ONE option that describes your health TODAY.

**Mobility**

- I have no problems in walking about
- I have slight problems in walking about
- I have moderate problems in walking about
- I have severe problems in walking about
- I am unable to walk about

© EuroQol research Foundation, EQ-5D

EQ-5D-5L 3

No Service 3:28 PM

Step 3 of 8 Cancel

Please select the ONE option that describes your health TODAY.

**Self-Care**

- I have no problems in washing or dressing myself
- I have slight problems in washing or dressing myself
- I have moderate problems in washing or dressing myself
- I have severe problems washing or dressing myself
- I am unable to wash or dress myself

© EuroQol research Foundation, EQ-5D

EQ-5D-5L 4

No Service 3:28 PM

Step 4 of 8 Cancel

Please select the ONE option that describes your health TODAY.

**Usual Activities**  
(e.g. work, study, housework, family or leisure activities)

- I have no problems doing my usual activities
- I have slight problems doing my usual activities
- I have moderate problems doing my usual activities
- I have severe problems doing my usual activities
- I am unable to do my usual activities

© EuroQol research Foundation, EQ-5D

EQ-5D-5L 5

No Service 3:28 PM

< Step 5 of 8 Cancel

Please select the ONE option that describes your health TODAY.

### Pain / Discomfort

- I have no pain or discomfort
- I have slight pain or discomfort
- I have moderate pain or discomfort
- I have severe pain or discomfort
- I have extreme pain or discomfort

© EuroQol research Foundation, EQ-5D

EQ-5D-5L 6

No Service 3:28 PM

< Step 6 of 8 Cancel

Please select the ONE option that describes your health TODAY.

### Anxiety / Depression

- I am not anxious or depressed
- I am slightly anxious or depressed
- I am moderately anxious or depressed
- I am severely anxious or depressed
- I am extremely anxious or depressed

© EuroQol research Foundation, EQ-5D

EQ-5D-5L 7

No Service 3:28 PM

< Step 7 of 8 Cancel

Please tap on the scale to indicate how your health is TODAY.

?

100

50

0

YOUR HEALTH TODAY

Next

© EuroQol research Foundation, EQ-5D

EQ-5D-5L 8

No Service 3:28 PM

< Step 8 of 8 Submit

## Thank you!

You have completed the health status survey.

Please hit the Submit button to confirm your answers, or use the back arrows to make any changes. Great job, thank you!

✓

## Physical Function Assessment (HAQ) 1

No Service 3:28 PM

Step 1 of 27 Cancel



### Health Assessment Questionnaire

Please check the response which best describes your usual abilities over the past week.

[Get Started](#)

© Stanford University

## Physical Function Assessment (HAQ) 2

No Service 10:58 AM

Step 2 of 27 Cancel

Please check the response which best describes your usual abilities over the past week.

### Dressing & Grooming

Are you able to dress yourself, including tying shoelaces and doing up buttons?

- Without ANY Difficulty
- With SOME Difficulty
- With MUCH Difficulty
- UNABLE To Do

© Stanford University

## Physical Function Assessment (HAQ) 3

No Service 3:28 PM

Step 3 of 27 Cancel

Please check the response which best describes your usual abilities over the past week.

### Dressing & Grooming

Are you able to shampoo your hair?

- Without ANY Difficulty
- With SOME Difficulty
- With MUCH Difficulty
- UNABLE To Do

© Stanford University

## Physical Function Assessment (HAQ) 4

No Service 3:29 PM

Step 4 of 27 Cancel

Please check the response which best describes your usual abilities over the past week.

### Rising

Are you able to stand up from a straight chair?

- Without ANY Difficulty
- With SOME Difficulty
- With MUCH Difficulty
- UNABLE To Do

© Stanford University

## Physical Function Assessment (HAQ) 5

No Service 3:29 PM

< Step 5 of 27 Cancel

Please check the response which best describes your usual abilities over the past week.

### Rising

Are you able to get in and out of bed?

- Without ANY Difficulty
- With SOME Difficulty
- With MUCH Difficulty
- UNABLE To Do

© Stanford University

## Physical Function Assessment (HAQ) 6

No Service 3:29 PM

< Step 6 of 27 Cancel

Please check the response which best describes your usual abilities over the past week.

### Eating

Are you able to cut up your meat?

- Without ANY Difficulty
- With SOME Difficulty
- With MUCH Difficulty
- UNABLE To Do

© Stanford University

## Physical Function Assessment (HAQ) 7

No Service 3:29 PM

< Step 7 of 27 Cancel

Please check the response which best describes your usual abilities over the past week.

### Eating

Are you able to lift a full cup or glass to your mouth?

- Without ANY Difficulty
- With SOME Difficulty
- With MUCH Difficulty
- UNABLE To Do

© Stanford University

## Physical Function Assessment (HAQ) 8

No Service 3:29 PM

< Step 8 of 27 Cancel

Please check the response which best describes your usual abilities over the past week.

### Eating

Are you able to open a new milk carton?

- Without ANY Difficulty
- With SOME Difficulty
- With MUCH Difficulty
- UNABLE To Do

© Stanford University

## Physical Function Assessment (HAQ) 9

No Service 3:29 PM

< Step 9 of 27 Cancel

Please check the response which best describes your usual abilities over the past week.

### Walking

Are you able to walk outdoors on flat ground?

- Without ANY Difficulty
- With SOME Difficulty
- With MUCH Difficulty
- UNABLE To Do

© Stanford University

## Physical Function Assessment (HAQ) 10

No Service 3:29 PM

< Step 10 of 27 Cancel

Please check the response which best describes your usual abilities over the past week.

### Walking

Are you able to climb up to five steps?

- Without ANY Difficulty
- With SOME Difficulty
- With MUCH Difficulty
- UNABLE To Do

© Stanford University

## Physical Function Assessment (HAQ) 11

No Service 3:29 PM

< Step 11 of 27 Next

Please check any of the following aids or devices that you usually use for any of the previously mentioned activities.

- Cane
- Walker
- Devices used for dressing (button hook, zip-puller, long-handled shoe horn, etc)
- Built up or special utensils (such as for eating and cooking)
- Crutches
- Special or built up chair
- Wheelchair
- Other

© Stanford University

## Physical Function Assessment (HAQ) 12

No Service 3:29 PM

< Step 12 of 27 Next

Please check any of the following categories for which you usually need help from another person.

- Dressing and grooming
- Rising
- Eating
- Walking

© Stanford University

## Physical Function Assessment (HAQ) 13

No Service 3:29 PM

< Step 13 of 27 Cancel

Please check the response which best describes your usual abilities over the past week.

### Hygiene

Are you able to wash and dry your body?

- Without ANY Difficulty
- With SOME Difficulty
- With MUCH Difficulty
- UNABLE To Do

© Stanford University

## Physical Function Assessment (HAQ) 14

No Service 3:29 PM

< Step 14 of 27 Cancel

Please check the response which best describes your usual abilities over the past week.

### Hygiene

Are you able to take a tub bath?

- Without ANY Difficulty
- With SOME Difficulty
- With MUCH Difficulty
- UNABLE To Do

© Stanford University

## Physical Function Assessment (HAQ) 15

No Service 3:29 PM

< Step 15 of 27 Cancel

Please check the response which best describes your usual abilities over the past week.

### Hygiene

Are you able to get on and off the toilet?

- Without ANY Difficulty
- With SOME Difficulty
- With MUCH Difficulty
- UNABLE To Do

© Stanford University

## Physical Function Assessment (HAQ) 16

No Service 3:29 PM

< Step 16 of 27 Cancel

Please check the response which best describes your usual abilities over the past week.

### Reach

Are you able to reach and get down a 5 pound object (such as a bag of sugar) from just above your head?

- Without ANY Difficulty
- With SOME Difficulty
- With MUCH Difficulty
- UNABLE To Do

© Stanford University

## Physical Function Assessment (HAQ) 17

No Service 3:29 PM

< Step 17 of 27 Cancel

Please check the response which best describes your usual abilities over the past week.

### Reach

Are you able to bend down to pick up clothing from the floor?

- Without ANY Difficulty
- With SOME Difficulty
- With MUCH Difficulty
- UNABLE To Do

© Stanford University

## Physical Function Assessment (HAQ) 18

No Service 3:29 PM

< Step 18 of 27 Cancel

Please check the response which best describes your usual abilities over the past week.

### Grip

Are you able to open car doors?

- Without ANY Difficulty
- With SOME Difficulty
- With MUCH Difficulty
- UNABLE To Do

© Stanford University

## Physical Function Assessment (HAQ) 19

No Service 3:30 PM

< Step 19 of 27 Cancel

Please check the response which best describes your usual abilities over the past week.

### Grip

Are you able to open jars which have been previously opened?

- Without ANY Difficulty
- With SOME Difficulty
- With MUCH Difficulty
- UNABLE To Do

© Stanford University

## Physical Function Assessment (HAQ) 20

No Service 3:30 PM

< Step 20 of 27 Cancel

Please check the response which best describes your usual abilities over the past week.

### Grip

Are you able to turn faucets on and off?

- Without ANY Difficulty
- With SOME Difficulty
- With MUCH Difficulty
- UNABLE To Do

© Stanford University



## Physical Function Assessment (HAQ) 21

No Service 3:30 PM

< Step 21 of 27 Cancel

Please check the response which best describes your usual abilities over the past week.

### Activities

Are you able to run errands and shop?

- Without ANY Difficulty
- With SOME Difficulty
- With MUCH Difficulty
- UNABLE To Do

© Stanford University

## Physical Function Assessment (HAQ) 22

No Service 3:30 PM

< Step 22 of 27 Cancel

Please check the response which best describes your usual abilities over the past week.

### Activities

Are you able to get in and out of a car?

- Without ANY Difficulty
- With SOME Difficulty
- With MUCH Difficulty
- UNABLE To Do

© Stanford University

## Physical Function Assessment (HAQ) 23

No Service 3:30 PM

< Step 23 of 27 Cancel

Please check the response which best describes your usual abilities over the past week.

### Activities

Are you able to do chores such as vacuuming or yardwork?

- Without ANY Difficulty
- With SOME Difficulty
- With MUCH Difficulty
- UNABLE To Do

© Stanford University

## Physical Function Assessment (HAQ) 24

No Service 3:30 PM

< Step 24 of 27 Next

Please check any of the following aids or devices that you usually use for any of the previously mentioned activities.

- Raised Toilet Seat
- Bathtub seat
- Jar Opener  
(for jars previously opened)
- Bathtub bar
- Long-handled appliances for reach
- Long-handled appliances in the bathroom  
(e.g. a long-handled brush)
- Other

© Stanford University

## Physical Function Assessment (HAQ) 25

No Service 3:30 PM

< Step 25 of 27 Next

Please check any of the following categories for which you usually need help from another person.

- Hygiene
- Reach
- Gripping and opening things
- Errands and chores

© Stanford University

## Physical Function Assessment (HAQ) 26

No Service 3:30 PM

< Step 26 of 27 Cancel

We are also interested in learning whether or not you are affected by pain because of your illness.

How much pain have you had because of your illness in the past week?

Please rate the severity of your pain with a value of zero (no pain) to 100 (severe pain).

99

100

Next

© Stanford University

## Physical Function Assessment (HAQ) 27

No Service 3:30 PM

< Step 27 of 27 Submit

Thank you!

You have completed the physical function assessment. Please hit the Submit button to confirm your answers, or use the back arrows to make any changes. Great job, thank you!



© Stanford University

# Fatigue Scale Screens

Fatigue Scale (FACIT) 1

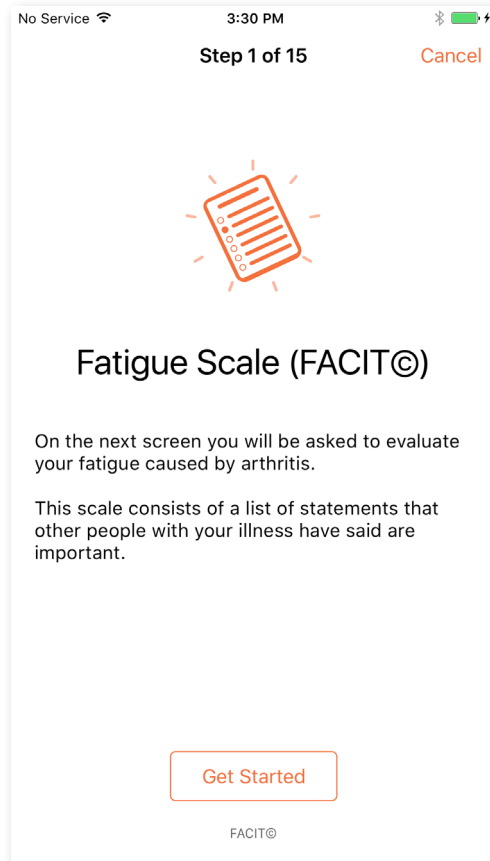

Fatigue Scale (FACIT) 2

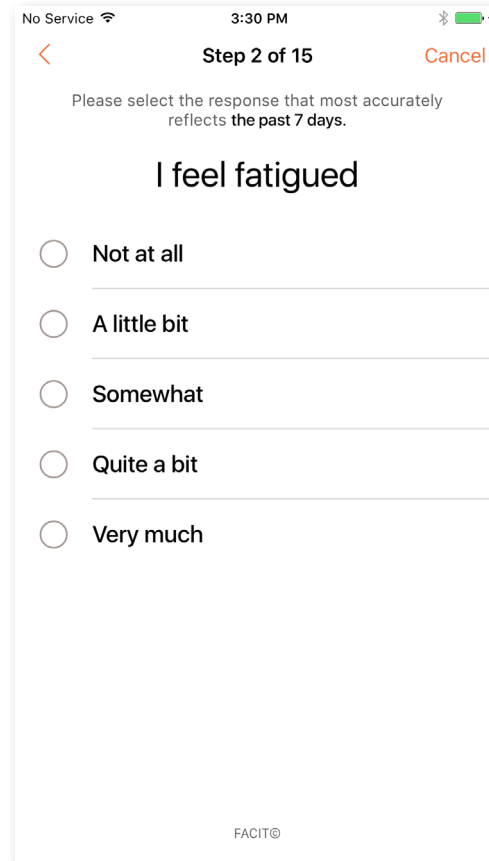

Fatigue Scale (FACIT) 3

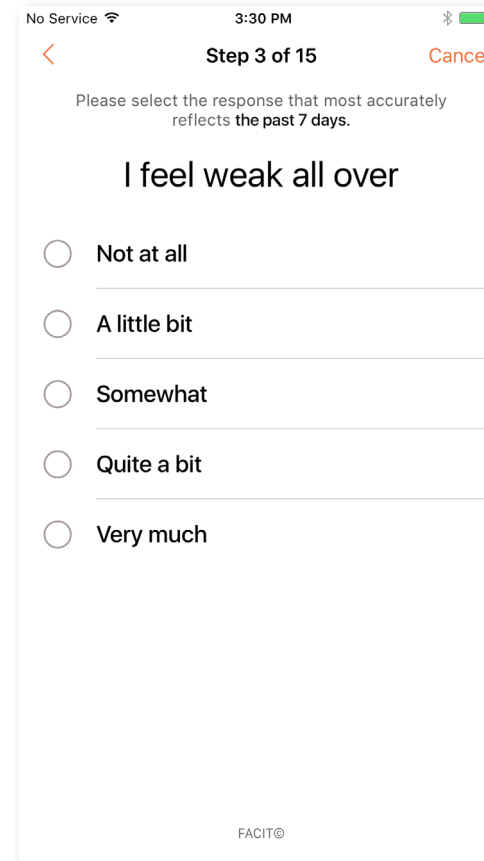

Fatigue Scale (FACIT) 4

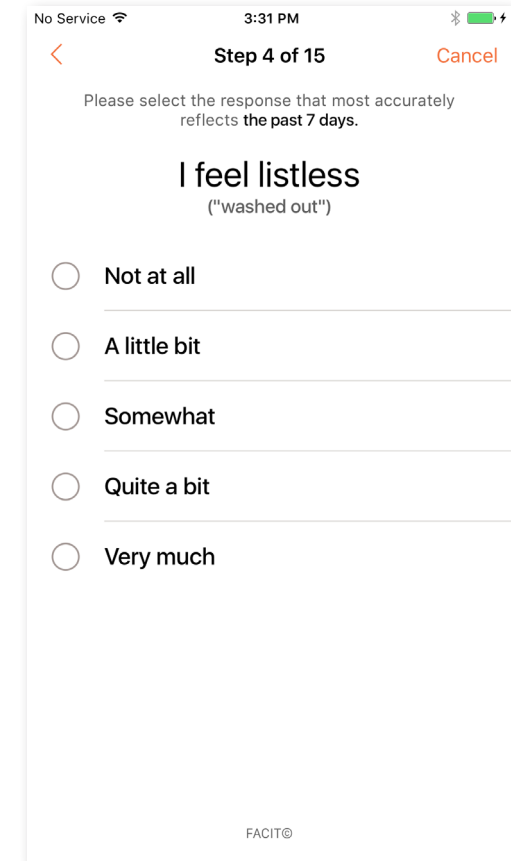

# Fatigue Scale Screens, 2

Fatigue Scale (FACIT) 5

No Service 3:31 PM

< Step 5 of 15 Cancel

Please select the response that most accurately reflects the past 7 days.

I feel tired

- Not at all
- A little bit
- Somewhat
- Quite a bit
- Very much

FACIT®

Fatigue Scale (FACIT) 6

No Service 3:31 PM

< Step 6 of 15 Cancel

Please select the response that most accurately reflects the past 7 days.

I have trouble starting things because I am tired

- Not at all
- A little bit
- Somewhat
- Quite a bit
- Very much

FACIT®

Fatigue Scale (FACIT) 7

No Service 3:31 PM

< Step 7 of 15 Cancel

Please select the response that most accurately reflects the past 7 days.

I have trouble finishing things because I am tired

- Not at all
- A little bit
- Somewhat
- Quite a bit
- Very much

FACIT®

Fatigue Scale (FACIT) 8

No Service 3:31 PM

< Step 8 of 15 Cancel

Please select the response that most accurately reflects the past 7 days.

I have energy

- Not at all
- A little bit
- Somewhat
- Quite a bit
- Very much

FACIT®

# Fatigue Scale Screens, 3

Fatigue Scale (FACIT) 9

No Service 3:31 PM

< Step 9 of 15 Cancel

Please select the response that most accurately reflects the past 7 days.

I am able to do my usual activities

- Not at all
- A little bit
- Somewhat
- Quite a bit
- Very much

FACIT©

Fatigue Scale (FACIT) 10

No Service 3:31 PM

< Step 10 of 15 Cancel

Please select the response that most accurately reflects the past 7 days.

I need to sleep during the day

- Not at all
- A little bit
- Somewhat
- Quite a bit
- Very much

FACIT©

Fatigue Scale (FACIT) 11

No Service 3:31 PM

< Step 11 of 15 Cancel

Please select the response that most accurately reflects the past 7 days.

I am too tired to eat

- Not at all
- A little bit
- Somewhat
- Quite a bit
- Very much

FACIT©

Fatigue Scale (FACIT) 12

No Service 3:31 PM

< Step 12 of 15 Cancel

Please select the response that most accurately reflects the past 7 days.

I need help doing my usual activities

- Not at all
- A little bit
- Somewhat
- Quite a bit
- Very much

FACIT©

# Fatigue Scale Screens, 4

Fatigue Scale (FACIT) 13

No Service 3:31 PM

< Step 13 of 15 Cancel

Please select the response that most accurately reflects the past 7 days.

I am frustrated by being too tired to do the things I want to do

- Not at all
- A little bit
- Somewhat
- Quite a bit
- Very much

FACIT©

Fatigue Scale (FACIT) 14

No Service 3:31 PM

< Step 14 of 15 Cancel

Please select the response that most accurately reflects the past 7 days.

I have to limit my social activity because I am tired

- Not at all
- A little bit
- Somewhat
- Quite a bit
- Very much

FACIT©

Fatigue Scale (FACIT) 15

No Service 3:31 PM

< Step 15 of 15 Submit

Thank you!

You have completed the fatigue scale.

Please hit the Submit button to confirm your answers, or use the back arrows to make any changes. Great job, thank you!

# Joint Pain Map Screens

Joint Pain Map 1

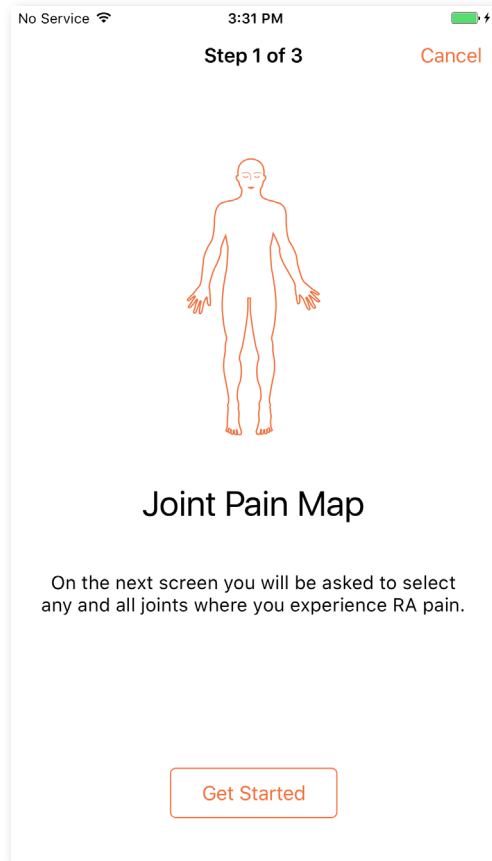

Joint Pain Map: More Info

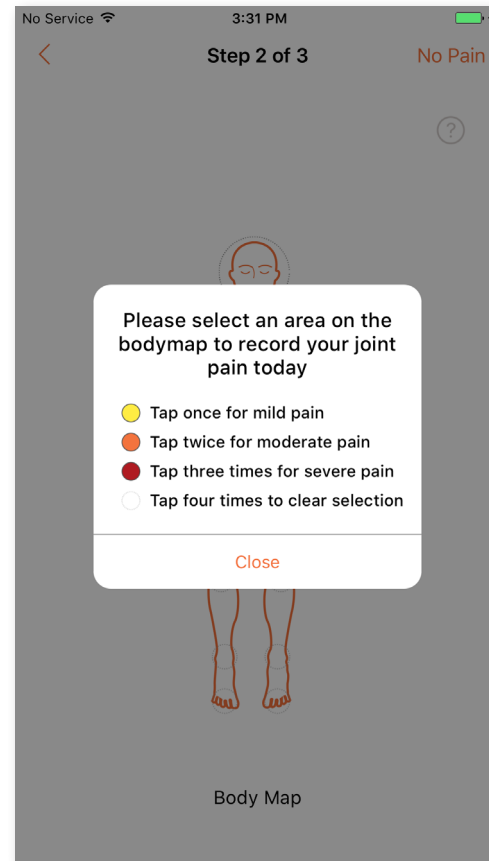

Joint Pain Map 2

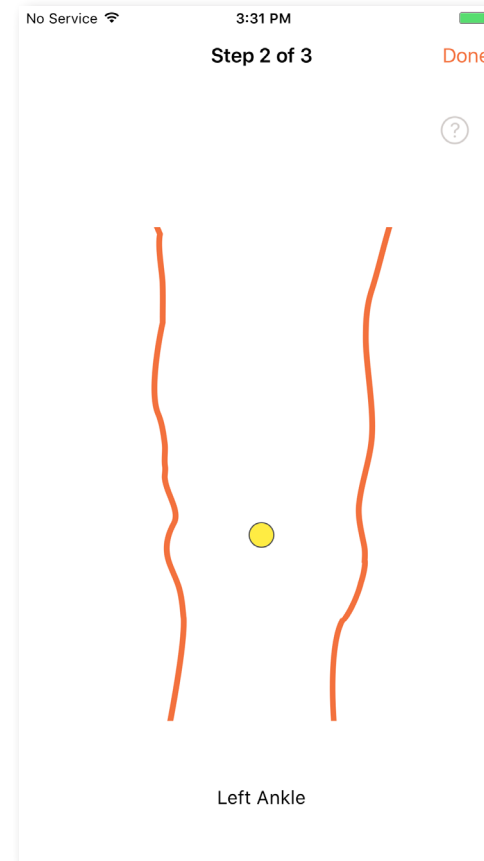

Joint Pain Map 3

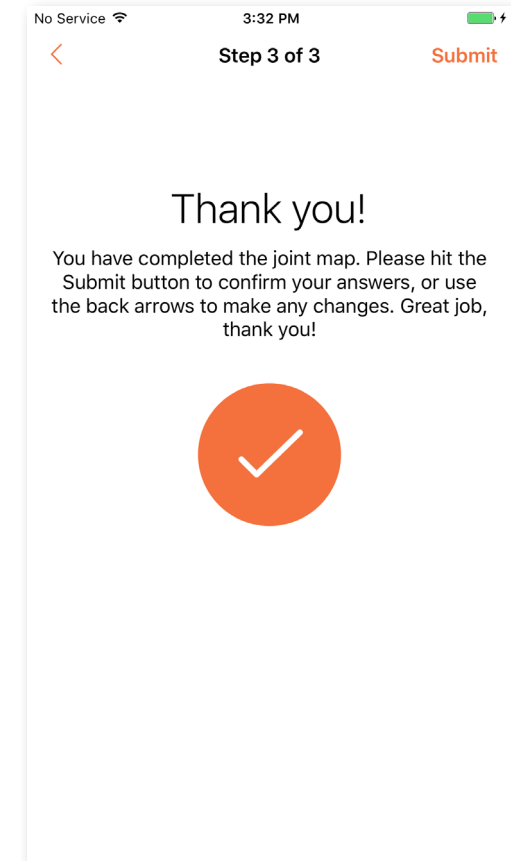

# Wrist Exercise Screens

Wrist Exercise 1

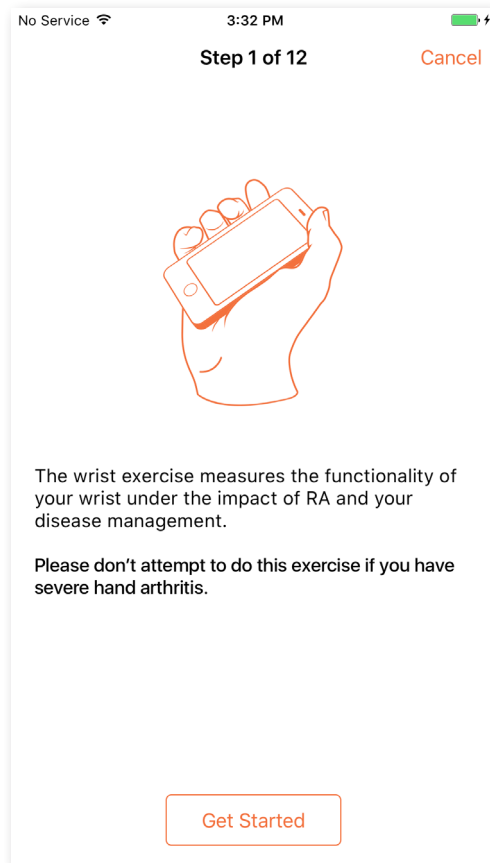

Wrist Exercise: GIF Tutorial 1

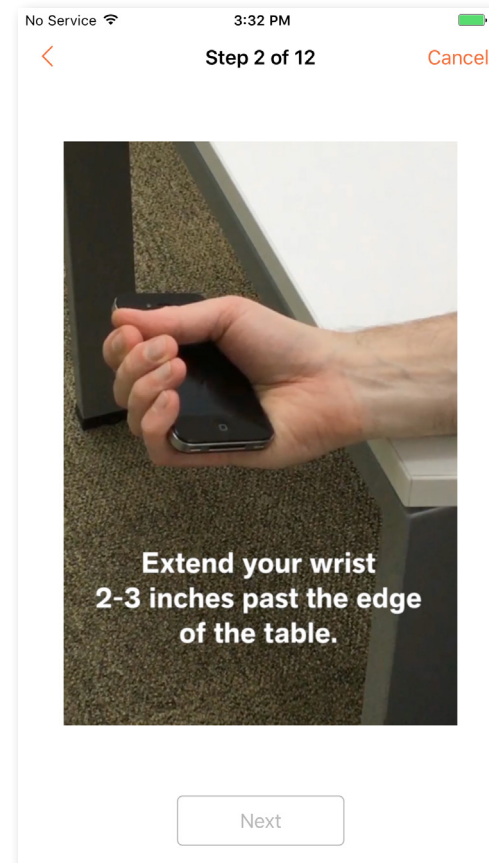

Wrist Exercise: GIF Tutorial 2

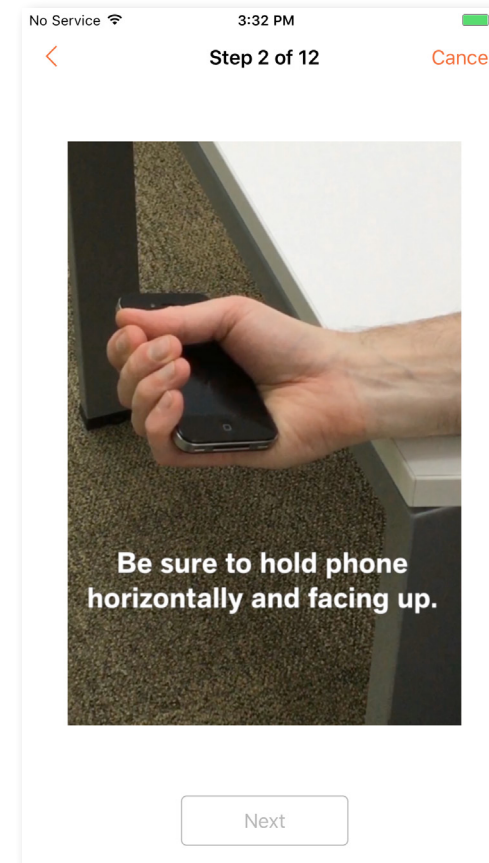

Wrist Exercise: GIF Tutorial 3

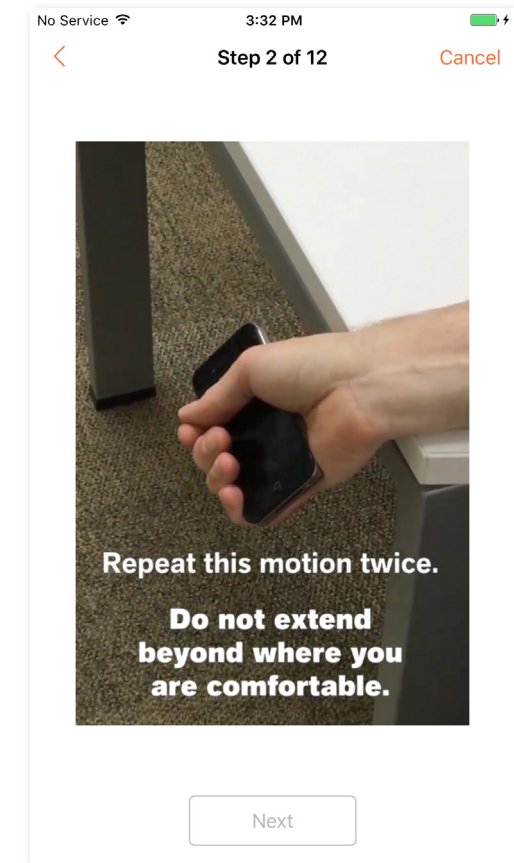



# Wrist Exercise Screens, 2

Wrist Exercise: GIF Tutorial 4

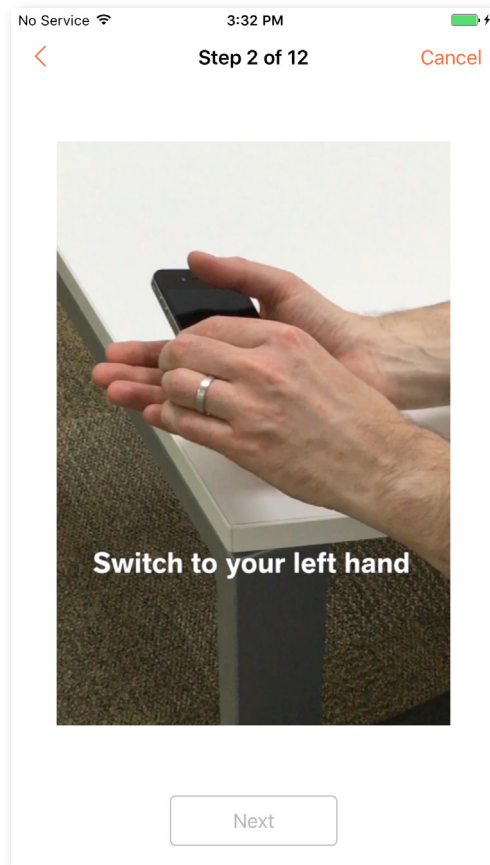

Wrist Exercise 3

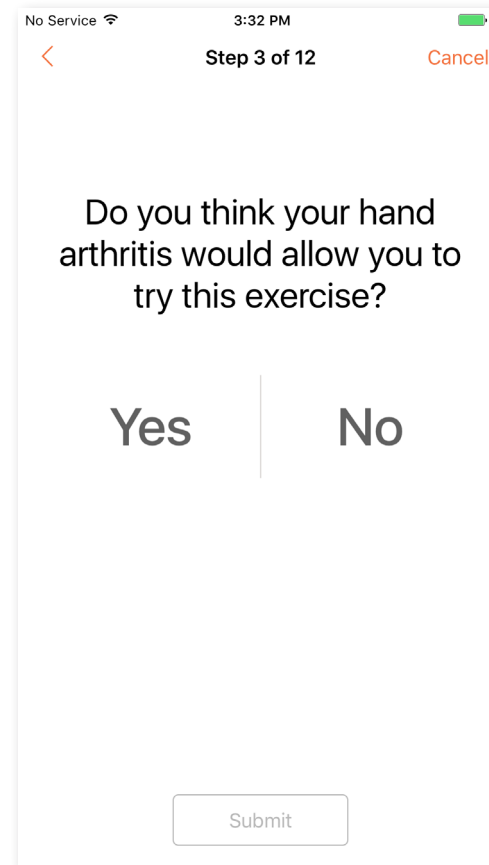

Wrist Exercise: Do Not Need To Complete

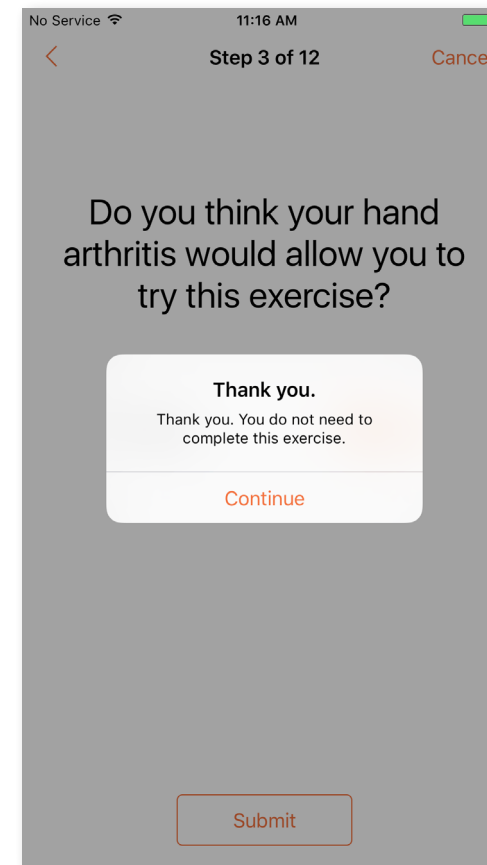

Wrist Exercise 4

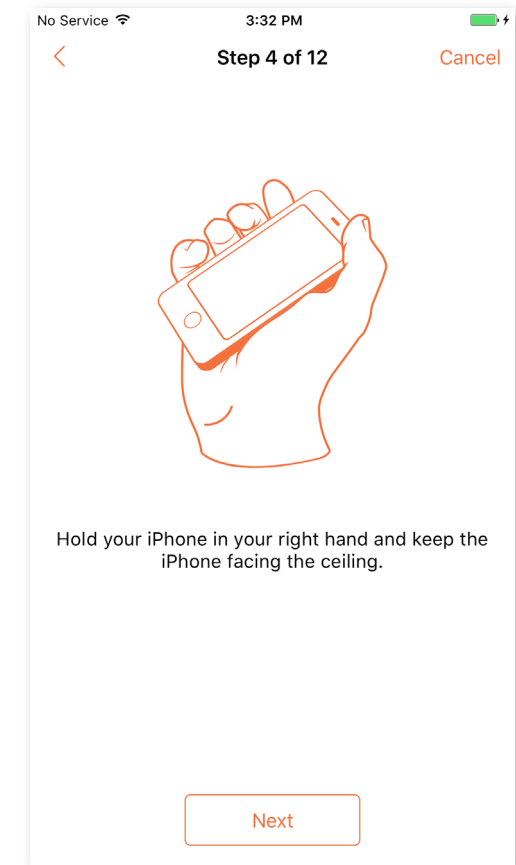

# Wrist Exercise Screens, 3

Wrist Exercise 5

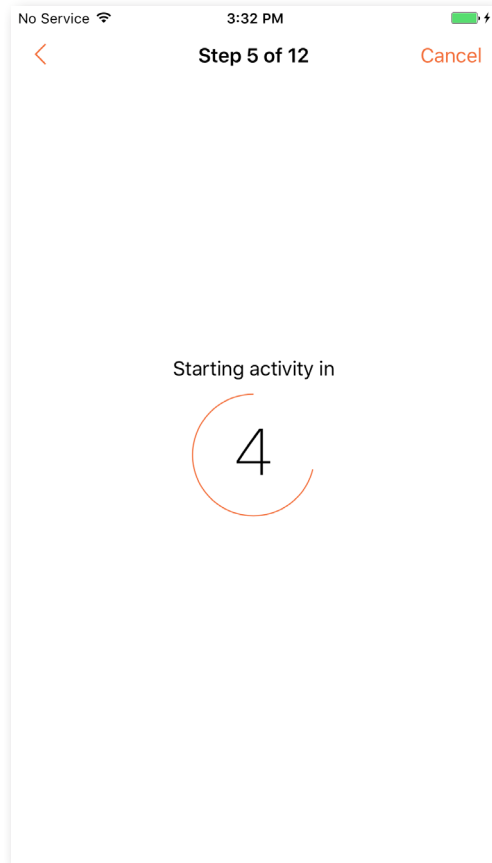

Wrist Exercise 6

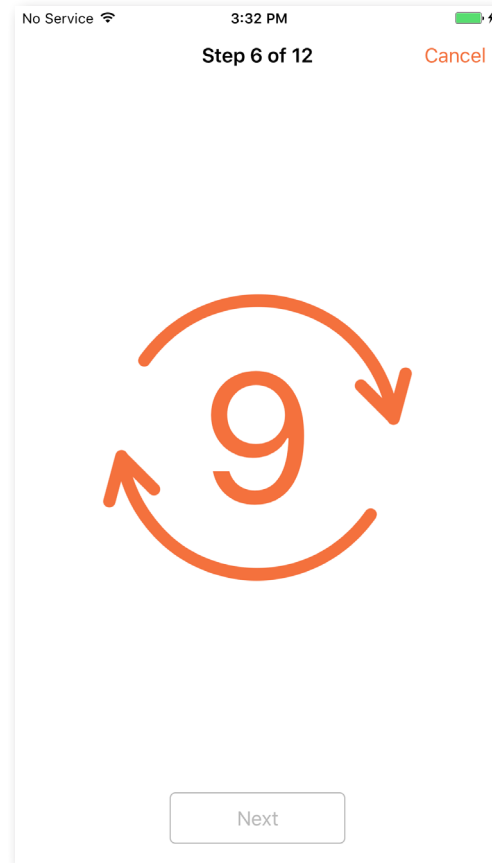

Wrist Exercise 7

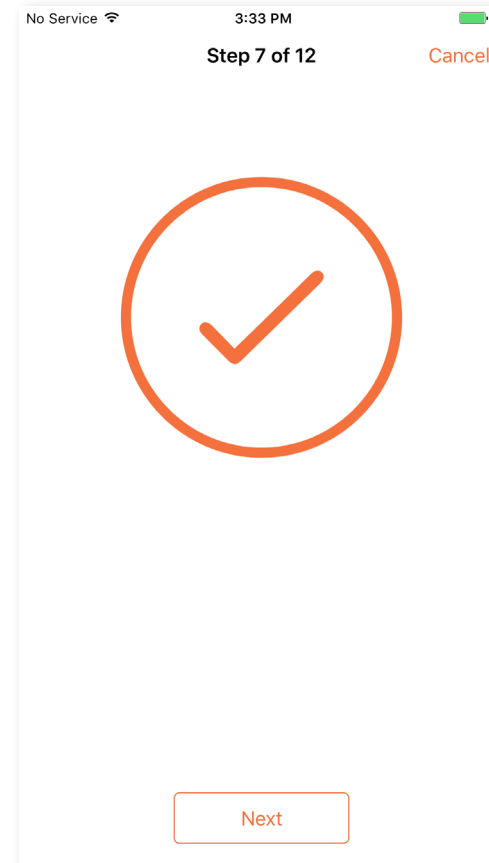

Wrist Exercise 8

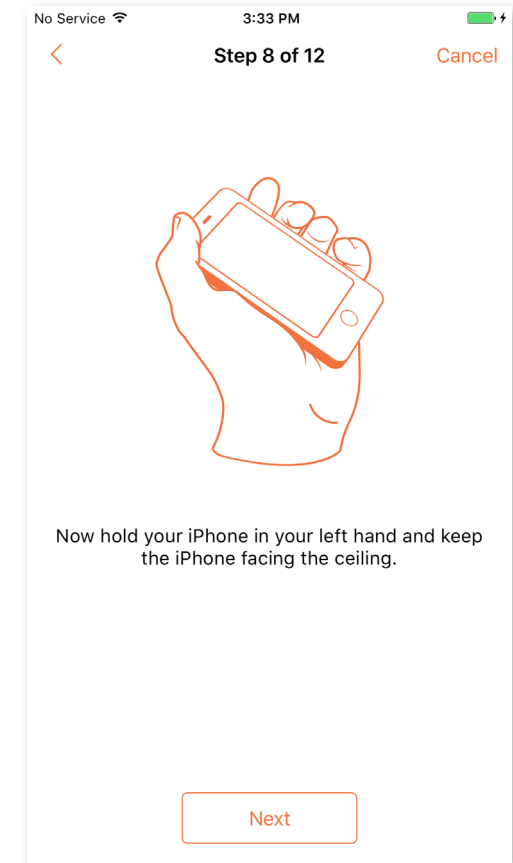

# Wrist Exercise Screens, 4

Wrist Exercise 9

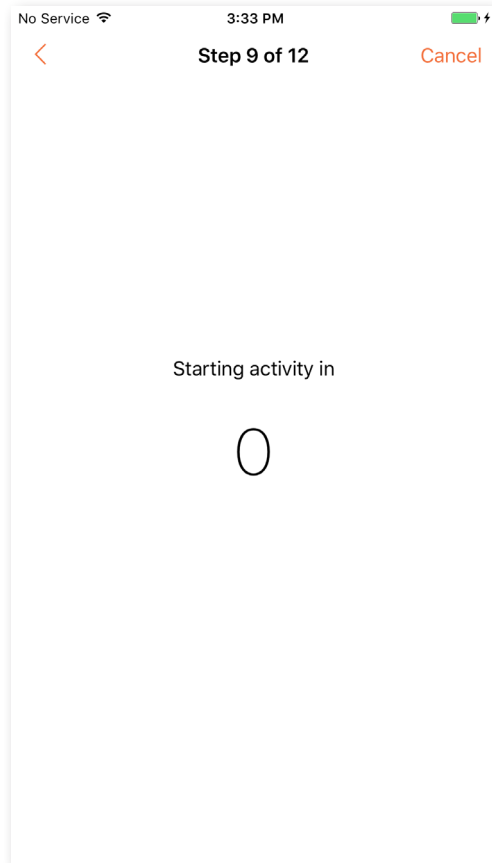

Wrist Exercise 10

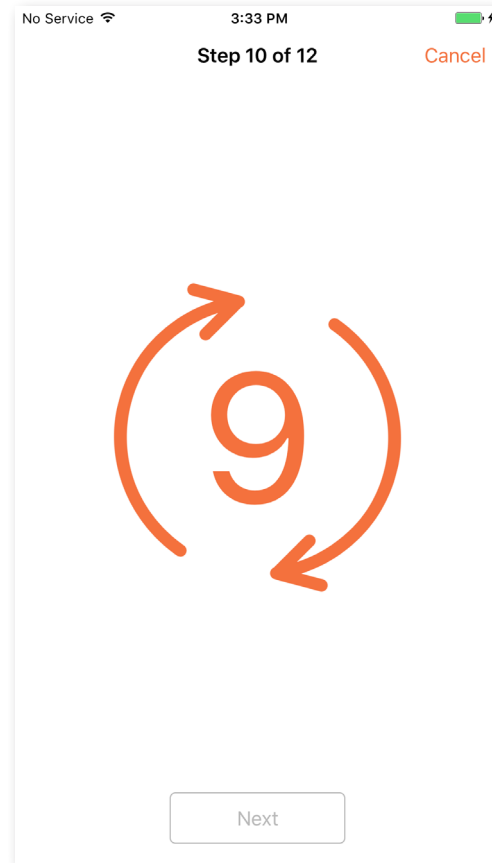

Wrist Exercise 11

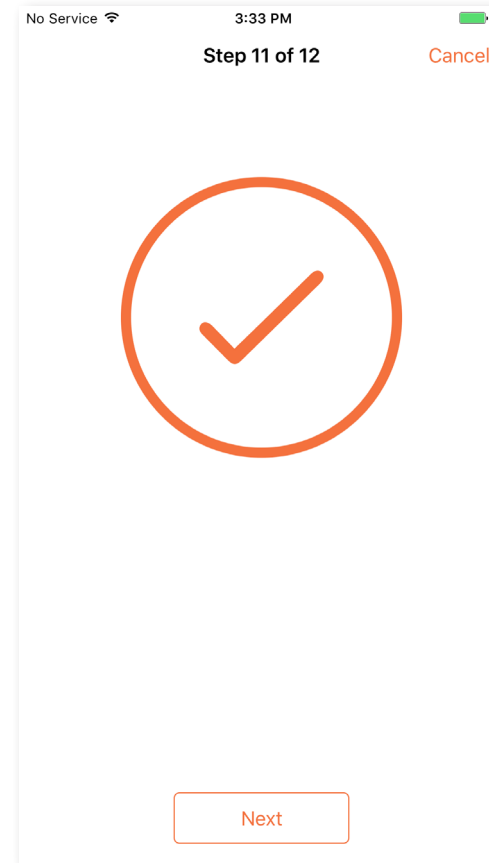

Wrist Exercise 12

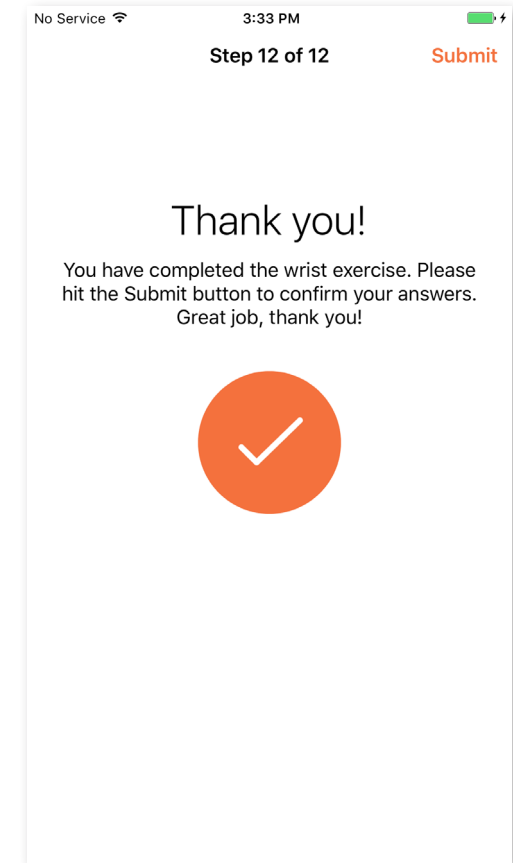

# End of Study Screens

End of Study 1

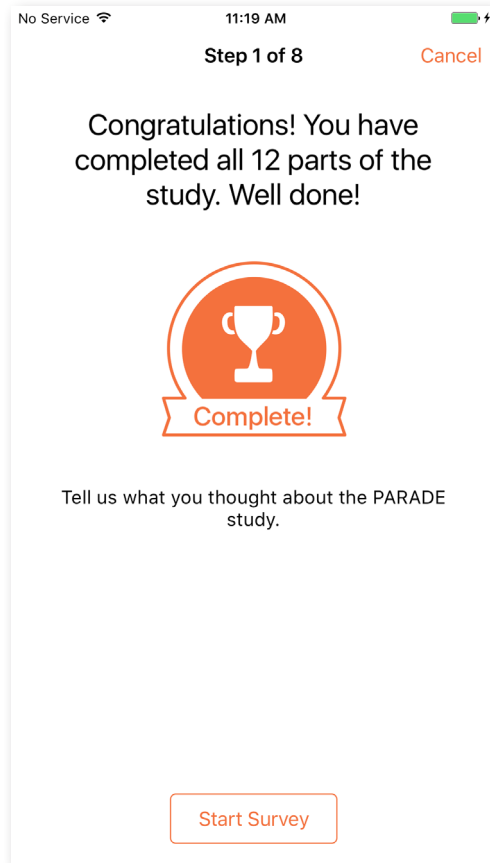

End of Study 2

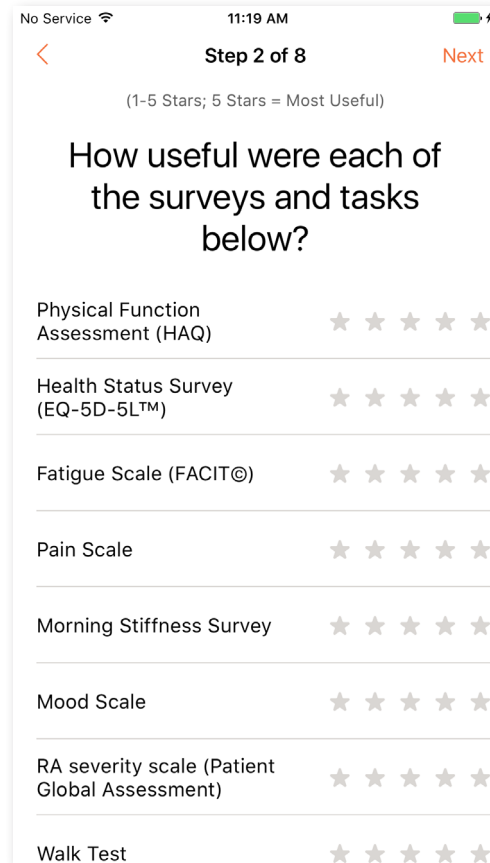

End of Study 2 (cont.)

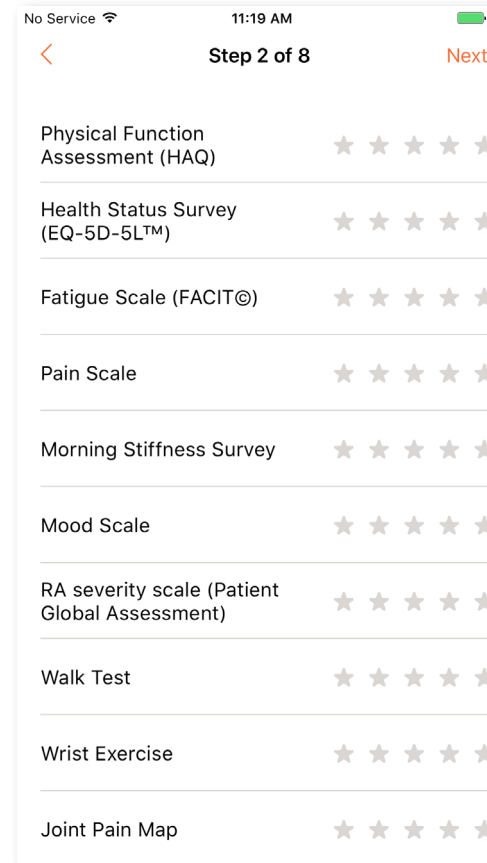

End of Study 3

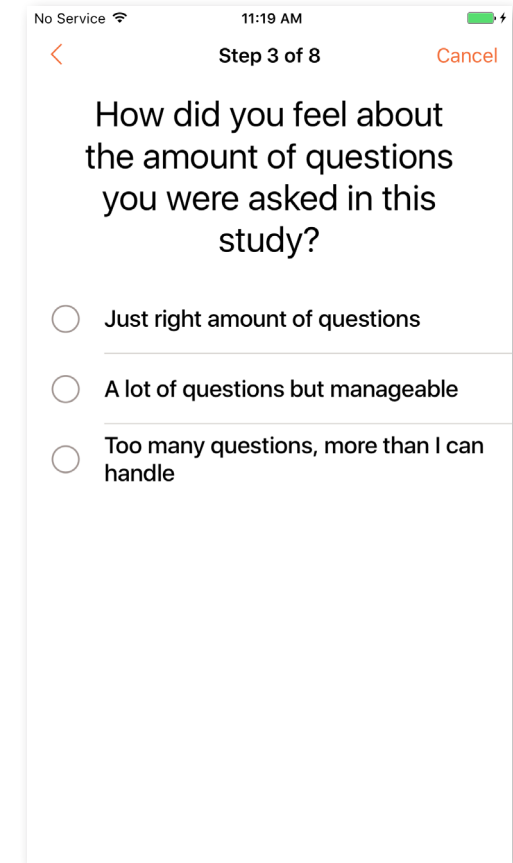

# End of Study Screens, 2

End of Study 4

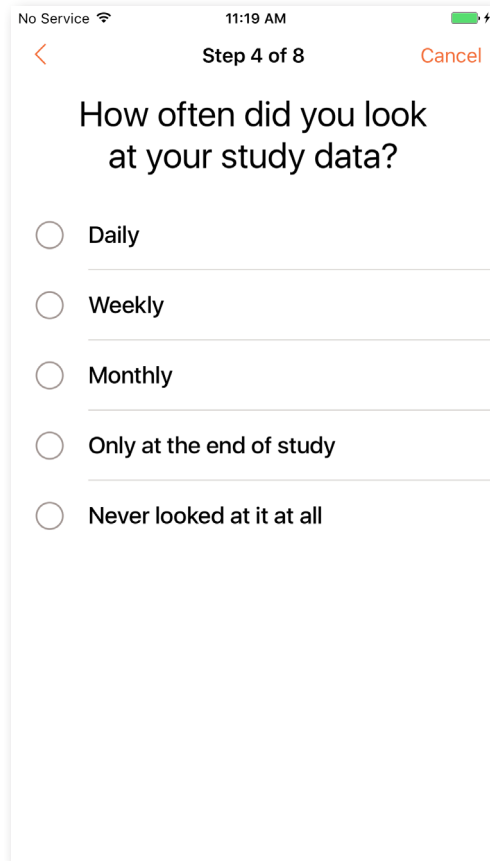

No Service 11:19 AM

< Step 4 of 8 Cancel

How often did you look at your study data?

- Daily
- Weekly
- Monthly
- Only at the end of study
- Never looked at it at all

End of Study 5

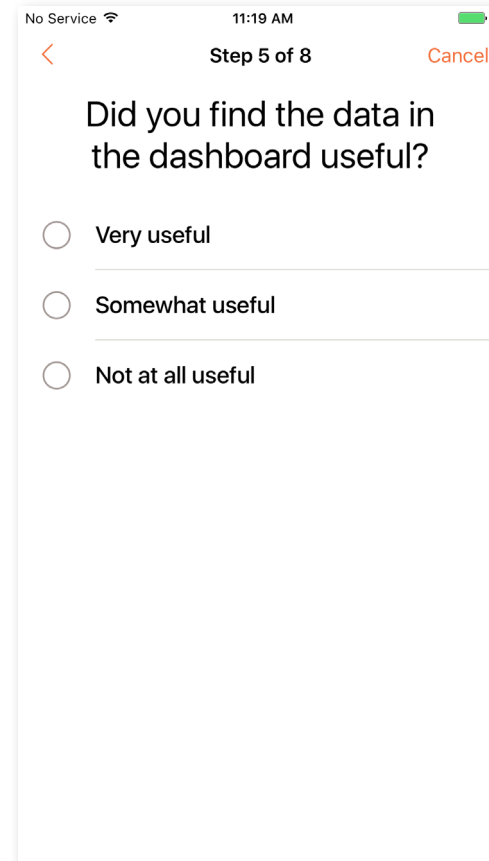

No Service 11:19 AM

< Step 5 of 8 Cancel

Did you find the data in the dashboard useful?

- Very useful
- Somewhat useful
- Not at all useful

End of Study 6

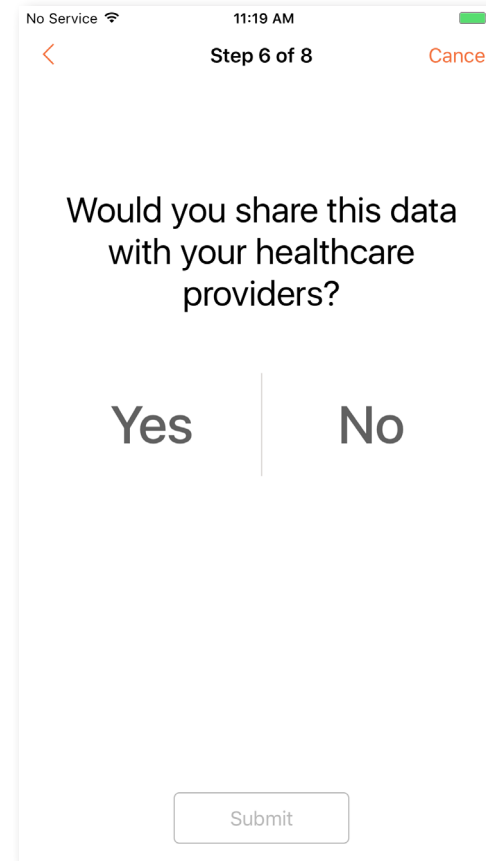

No Service 11:19 AM

< Step 6 of 8 Cancel

Would you share this data with your healthcare providers?

Yes | No

Submit

End of Study 7

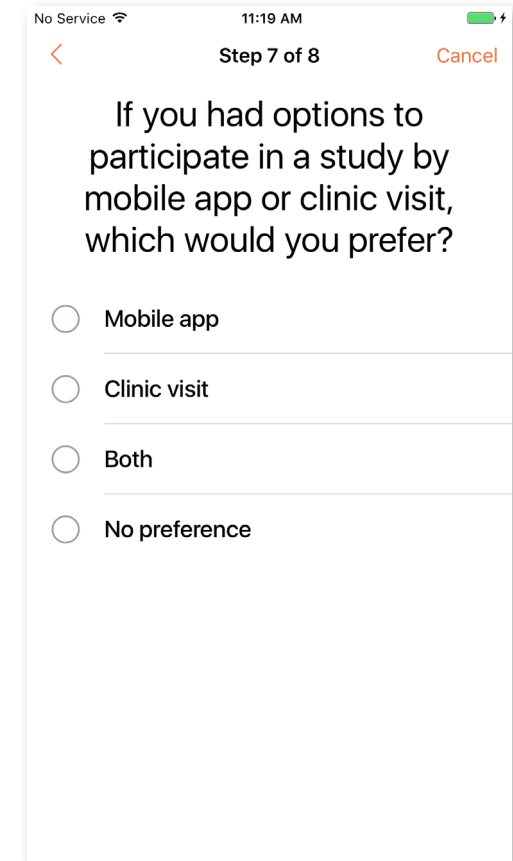

No Service 11:19 AM

< Step 7 of 8 Cancel

If you had options to participate in a study by mobile app or clinic visit, which would you prefer?

- Mobile app
- Clinic visit
- Both
- No preference

# End of Study Screens, 3

## End of Study 8

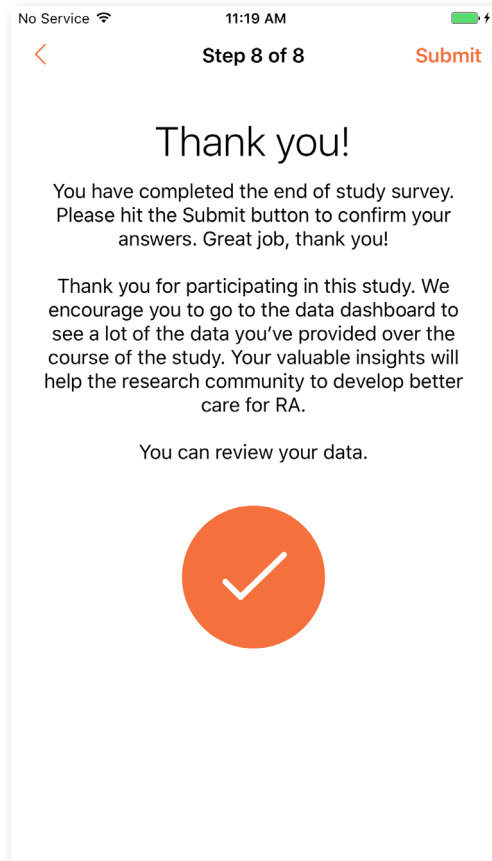

# Thank You!

For questions please contact:

Brianne Bell  
Project Manager  
[brianne.bell@possible.com](mailto:brianne.bell@possible.com)

**POSSIBLE** mobile
