# Supplementary material for: Using a ResearchKit Smartphone App to Collect Rheumatoid Arthritis Symptoms From Real-World Participants: Feasibility Study
Source: PubMed Central journal article supplement (PMC6231853; doi:10.2196/mhealth.9656), 2018-09-13
Supplement: mhealth_v6i9e177_app2.pdf [file mhealth_v6i9e177_app2.pdf]

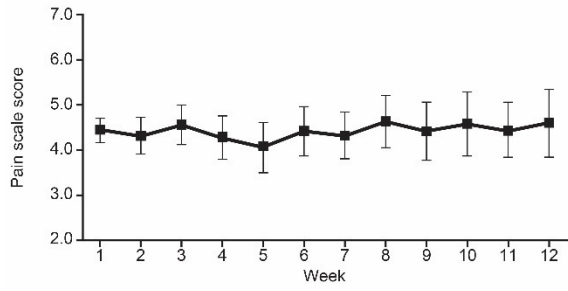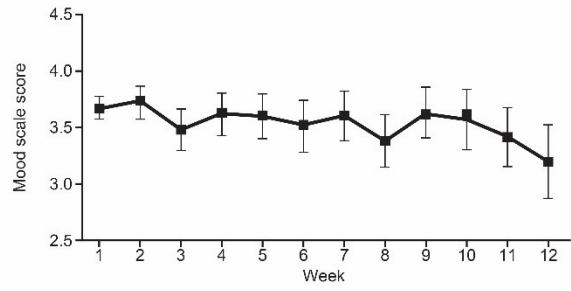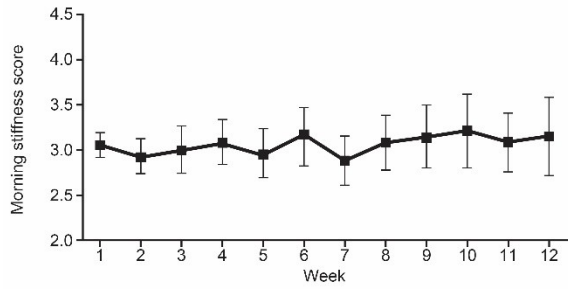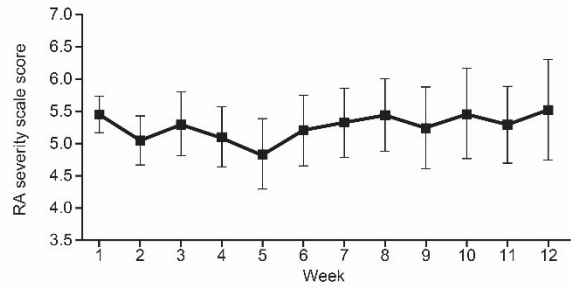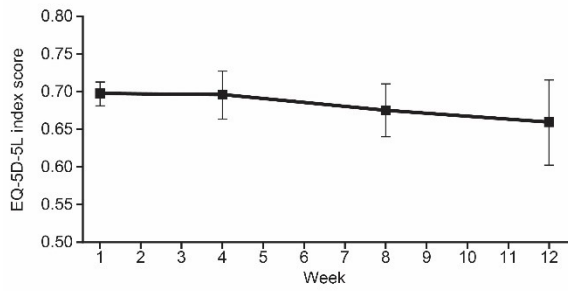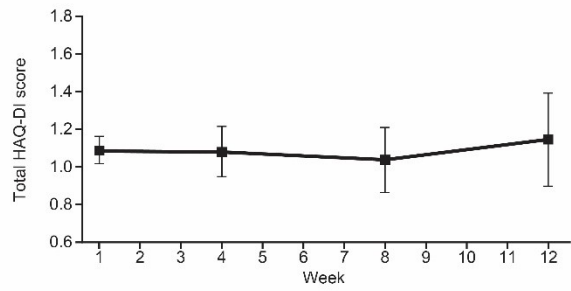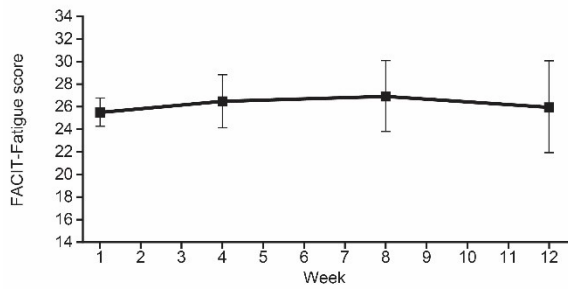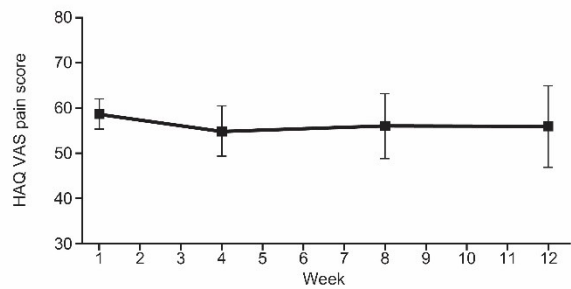

**Multimedia Appendix 2.** Mean patient-reported outcome responses

EQ-5D-5L, 5-level version of the Euro Quality of Life, 5-dimensions; FACIT, Functional Assessment of Chronic Illness Therapy; HAQ-DI, Health Assessment Questionnaire-Disability Index; HAQ-VAS, Health Assessment Questionnaire-Visual Analog Scale; RA, rheumatoid arthritis
